1     **Flexible allocation of attention in time or space across the life span: Theta**  
2     **and alpha oscillatory signatures of age-related decline and compensation as**  
3                                     **revealed by MEG**

4

5

6                                     **Eleanor Callaghan<sup>a,b,1</sup>, Carol Holland<sup>a,2</sup>, Klaus Kessler<sup>\*b</sup>**

7

8

9     <sup>a</sup>Aston Research Centre for Healthy Ageing, Aston University, Birmingham, UK

10    <sup>b</sup>Aston Brain Centre, Aston University, Birmingham, UK\*

11    <sup>1</sup>Present address: Max Planck Institute for Psycholinguistics, Nijmegen, Netherlands.

12    <sup>2</sup>Present address: Centre for Ageing Research, Division of Health Research, Lancaster Uni-  
13    versity, Lancaster, UK.

14

15    **\*Correspondence:**

16    Prof. Klaus Kessler

17    [k.kessler@aston.ac.uk](mailto:k.kessler@aston.ac.uk)

18    Life and Health Sciences, Psychology, Aston University, Birmingham, UK, B4 7ET

19

20

21    Declaration of interests: None.

22

23

### Abstract

24 In our recent behavioural research (Callaghan et al., 2017) we reported age-related changes in  
25 the speed of switching between temporal and spatial attention. Using magnetoencephalogra-  
26 phy (MEG), we now compared the neural signatures between three age groups (19-30, 40-49  
27 and 60+ years) and found differences in task-related modulation and cortical localisation of  
28 alpha and theta oscillations as well as in functional network connectivity. Efficient (fast)  
29 switching between the temporal and spatial attention tasks in the youngest group was re-  
30 flected by parietal theta effects that were absent in the older groups. Difficulties in refocusing  
31 attention in the older and middle-aged adults (slowed response times) were accompanied by  
32 reduced theta power modulation in occipital and cerebellar regions. Older and middle-aged  
33 adults seem to compensate for this posterior theta deficit with increased recruitment of frontal  
34 (both groups) and temporal (older group) areas, possibly reflecting a greater dependence on  
35 top-down attentional control. Importantly, rather than theta oscillatory connectivity becoming  
36 weaker with age due to increased neural noise, both older age groups displayed stronger and  
37 more widely distributed connectivity. However, differences in alpha-band modulations did  
38 not translate into enhanced connectivity patterns in the older groups. Overall we conclude  
39 that theta oscillations and connectivity reflect compensatory strategies in older and middle  
40 age that induce a posterior to anterior processing shift, while alpha oscillations might reflect  
41 increased neural noise but require further investigation.

42

43 **Keywords: aging, cognitive decline, attention switching, brain oscillations, network con-**  
44 **nectivity, magnetoencephalography**

45

46 **Abbreviations:** ACC, Anterior cingulate cortex; ACE-3, Addenbrookes cognitive examina-  
47 tion 3; ANOVA, Analysis of variance; DICS, Dynamic imaging of coherent sources; EEG,  
48 electroencephalography; FFT, Fast Fourier Transform; (f)MRI, (Functional) magnetic reso-  
49 nance imaging; HPI, Head Position Indicator; ICA, Independent component analysis; IPS,  
50 Intraparietal sulcus; LCMV, Linearly constrained minimum variance; MEG, Magnetoen-  
51 cephalography; MFG, Middle frontal gyrus; MNI, Montreal Neurological Institute; MSR,  
52 Magnetically shielded room; MST, Minimum spanning tree; NBS, Network based statistics;  
53 NTVA, Neural Theory of Visual Attention; PASA, Posterior to anterior shift in ageing; PET,  
54 Positron emission tomography; PFC, Prefrontal cortex; RSVP, Rapid serial visual presenta-

55 tion; SFG, Superior frontal gyrus; SNR, Signal to noise ratio; STAC, scaffolding theory of  
56 aging and cognition; TFR, Time-frequency representation; VS, Visual search; wPLI,  
57 Weighted phase lag index.

## 58 **1. Background**

59

### 60 **1.1. Age-related decline of attention**

61 It has recently been found that switching between temporal and spatial attention becomes  
62 more difficult with increased age (Callaghan et al., 2017). Exploring the neural mechanisms  
63 that underpin this age-related difficulty in refocusing attention would further our understand-  
64 ing of age-related cognitive decline and could inform the development of interventions that  
65 may prevent or delay deterioration of performance on important daily activities such as driv-  
66 ing (Callaghan et al., 2017). Age-related deterioration has been reported separately for tem-  
67 poral as well as spatial selective attention (Bennett et al., 2012; Foster et al., 1995; Humphrey  
68 and Kramer, 1997; Lahar et al., 2001; Lee and Hsieh, 2009; Li et al., 2013; Maciokas and  
69 Crognale, 2003; Plude and Doussardroosevelt, 1989), while the potential deficits in switching  
70 attention from one mode to the other has remained largely under-investigated (Callaghan et  
71 al., 2017).

72

73 Spatial attention is often quantified with a visual search (VS) task, in which participants' re-  
74 sponse times (RTs) to detect a predefined visual target among an array of distractors is re-  
75 corded. It is well established that there are specific age-related declines in serial but not pop-  
76 out VS performance with increased age. Older adults' increased RTs on pop-out VS tasks, in  
77 which the target is distinct from the distractors and "pops out" of the VS display, remain con-  
78 stant with increasing numbers of distractors and have therefore been attributed to general  
79 slowing (Bennett et al., 2012; Foster et al., 1995; Humphrey and Kramer, 1997; Li et al.,  
80 2013; Plude and Doussardroosevelt, 1989). In contrast, VS performance is thought to decline  
81 with age when the target and distractors are visually indistinct and share certain features, and  
82 a serial search is required (Bennett et al., 2012; Foster et al., 1995; Humphrey and Kramer,  
83 1997; Li et al., 2013; Plude and Doussardroosevelt, 1989). In serial VS task performance, the  
84 increase in RTs with increasing numbers of distractors becomes steeper with age, which has  
85 been interpreted as a deficit in the mechanisms specific to serial VS rather than a general  
86 slowing of RTs (Bennett et al., 2012; Foster et al., 1995; Humphrey and Kramer, 1997; Li et  
87 al., 2013; Plude and Doussardroosevelt, 1989).

88

89 There are also age-related declines in temporal attention. Older adults are not only slower at  
90 processing visual stimuli (Ball et al., 2006; Rubin et al., 2007) but also display an increased  
91 magnitude of the “attentional blink”, which is commonly interpreted as a reflection of an at-  
92 tentional bottleneck (Lahar et al., 2001; Lee and Hsieh, 2009; Maciokas and Crognale, 2003;  
93 Shih, 2009; van Leeuwen et al., 2009). The attentional blink is where, for up to 500ms after  
94 detecting a target in a rapidly changing stream of visual stimuli - i.e. a rapid serial visual  
95 presentation (RSVP) stream - there is a reduced ability to detect a second target (Raymond et  
96 al., 1992). This effect is stronger and lasts for longer with increased age (Lahar et al., 2001;  
97 Lee and Hsieh, 2009; Maciokas and Crognale, 2003; Shih, 2009; van Leeuwen et al., 2009),  
98 which, again, cannot be explained by general slowing alone (Lee and Hsieh, 2009; Maciokas  
99 and Crognale, 2003).

100

101 It is widely acknowledged that older adults are impaired in inhibiting irrelevant visual infor-  
102 mation (Adamo et al., 2003; Gazzaley et al., 2008; Greenwood and Parasuraman, 1994;  
103 Hasher and Zacks, 1988; Lustig et al., 2007; Maciokas and Crognale, 2003). Difficulties in  
104 temporal and spatial attention may therefore be due to a decline in selective attention mecha-  
105 nisms resulting from impaired excitatory-inhibitory attention processes, where excitatory  
106 mechanisms fail to reach activation thresholds and inhibitory mechanisms fail to suppress  
107 interference from visual distractors (Shih, 2009). In other words, deficits in mechanisms sus-  
108 taining a balance between excitation and inhibition could lead to a decline of selective atten-  
109 tion efficiency in time or space. In a recent behavioural study (Callaghan et al., 2017), we in-  
110 vestigated whether further costs are incurred with age when these selective attention mecha-  
111 nisms have to be re-tuned or switched from selectively attending to targets in time to select-  
112 ing targets in space. We indeed observed increased “switch-costs” in older age groups. The  
113 current paper addresses the question of how the underlying neural mechanisms change to ex-  
114 plain this reduced attentional flexibility.

115

## 116 **1.2. Neural mechanisms of attention**

117 The neural implementation of excitatory and inhibitory attention mechanisms has been out-  
118 lined in influential neural competition models of visual attention, which postulate that nu-  
119 merous stimuli can be processed in parallel in perceptual networks, yet compete for access to  
120 conscious processing at the level of working memory (Beck and Kastner, 2009; Bundesen et  
121 al., 2005; Desimone, 1998; Scalf et al., 2013; Treisman, 1985; Treisman and Gormican,  
122 1988). Attention would then be defined as a bias towards enhancing some competing excita-

123 tion patterns over others. This proposition is supported by evidence from single cell re-  
124 cordings (Reynolds et al., 1999), which suggest that this early competition is carried out in  
125 separate cell assemblies for separate stimuli (Luck et al., 1997). Attention can therefore be  
126 conceived of as a set of mechanisms that bias processing in favour of salient and/or task rele-  
127 vant stimuli through bottom-up as well as top-down signal enhancement of certain neural as-  
128 semblies (Dehaene et al., 2006). Similar to the “global neuronal workspace model” proposed  
129 by Dehaene and colleagues (1998; 2006), the Neural Theory of Visual Attention (NTVA;  
130 Bundesen et al., 2005) suggests that attention works to increase or decrease the number of  
131 neurons involved in processing each object and alters the firing rate of neurons coding for  
132 certain features. The authors further propose that as temporal expectation increases, temporal  
133 attention mechanisms increase the firing rate of neuronal populations that represent antici-  
134 pated features. In contrast, spatial attention would alter the number of cell assemblies allo-  
135 cated to processing objects in specific (attended) parts of the visual field (Bundesen et al.,  
136 2005; Vangkilde et al., 2012; Vangkilde et al., 2013). Thus, it could be expected that switch-  
137 ing between temporal and spatial attention requires adjustments to both firing rates and the  
138 allocation of feature-coding neuronal populations to receptive fields. Dehaene et al.’s (2006)  
139 framework of conscious visual processing proposes that frontal, parietal and anterior cingu-  
140 late regions are crucial for conscious processing of visual stimuli. According to this frame-  
141 work, fronto-parietal networks would be crucially involved in top-down changes in selective  
142 enhancement during attentional flexibility, dynamically adjusting expectations in space and  
143 time by modulating the temporal and spatial dynamics of firing rates in posterior neuronal  
144 populations.

145

146 Overlapping networks across occipital, frontal, parietal and motor regions have been impli-  
147 cated in both, directing attention in time and space (Coull and Nobre, 1998; Fu et al., 2005;  
148 Gross et al., 2004; Li et al., 2013; Madden et al., 2007; Shapiro et al., 2002). In addition to  
149 finding overlapping activation for temporal and spatial attention in their functional magnetic  
150 resonance imaging (fMRI) and positron emission tomography (PET) studies, Coull and  
151 Nobre (1998) found sub-patterns of activation that were distinct for the two types of atten-  
152 tion. Regions found to be involved in both spatial and temporal orienting of attention in both  
153 the PET and fMRI results were bilateral premotor cortex, intraparietal sulcus (IPS), visual  
154 cortex and cerebellum. PET revealed that, compared to temporal attention, spatial attention  
155 involved more activity in the inferior parietal lobule, whereas temporal orienting triggered  
156 more activity in the left IPS, left cerebellum and left ventral premotor cortex, the latter of

157 which was exclusive to temporal attention. Furthermore, the authors' fMRI results revealed  
158 right IPS and temporo-parietal junction activity specific to spatial orienting.

159

160 In addition to the distinct patterns of cortical activity across temporal and spatial attention,  
161 differences in cortical processing have been observed when comparing serial and pop-out VS  
162 or when comparing tasks with different attentional demands. For example, Imaruoka et al.  
163 (2003) found the right IPS was more strongly involved in pop-out than serial search, which  
164 the authors interpreted as an involvement of this region in bottom-up attention. In contrast,  
165 prefrontal regions have been implicated more generally in top-down executive control of at-  
166 tention (Badre and Wagner, 2004; Baluch and Itti, 2011; Bouvier, 2009; Kastner and  
167 Ungerleider, 2000; Kerns et al., 2004). In particular, the anterior cingulate cortex (ACC) has  
168 been associated with selective attention in more demanding tasks that require resolving con-  
169 flict between incongruent or ambiguous information (Badre and Wagner, 2004; Kerns et al.,  
170 2004).

171

### 172 **1.3. Inhibition, alpha oscillations and attention**

173 Shih (2009) proposed that age-related decline of attention could be a result of impaired neural  
174 inhibition and/or increased neural noise. Both increased neural noise and impaired inhibition  
175 could result in increased activation thresholds to select visual stimuli, thus, resulting in en-  
176 hanced difficulties in reaching these thresholds (Adamo et al., 2003; Aydin et al., 2013). The  
177 notion of increased neural noise is supported by increased age-related variability that affects  
178 signal-to-noise ratios in fMRI studies with older age groups (Huettel et al., 2001) as well as in  
179 studies using event related potentials (ERP), where increased variability results in reduced  
180 ERP amplitudes (Polich et al., 1985). The notion of inhibition has been strongly linked to al-  
181 pha oscillations (8-12 Hz), including task-related modulations in amplitude and phase.

182

183 It is now widely believed that inhibition is at least partly achieved through increased alpha  
184 frequency amplitudes (or frequency power) over parieto-occipital cortex, whereas an alpha  
185 decrease typically reflects enhanced attention in space and time (Capotosto et al., 2009;  
186 Hanslmayr et al., 2007; Hanslmayr et al., 2005; Klimesch et al., 2007; Rohenkohl and Nobre,  
187 2011; Sauseng et al., 2005; Thut et al., 2006; Yamagishi et al., 2003). In addition to inhibition  
188 of irrelevant sensory information, alpha increases are also typically present during sustained  
189 attention (Dockree et al., 2007; Rihs et al., 2007, 2009) and are likely to inhibit unattended  
190 locations and irrelevant sensory information (Rihs et al., 2007). Successful visual target dis-

191 crimination can be predicted by the magnitude of pre-stimulus alpha suppression (Hanslmayr  
192 et al., 2007; Hanslmayr et al., 2005) and by the instantaneous phase of the alpha cycle during  
193 stimulus presentation (Busch et al., 2009; Busch and VanRullen, 2010; Dugué et al., 2011;  
194 Mathewson et al., 2009). It has therefore been proposed that posterior alpha oscillations sup-  
195 press processing through sensory gating, where the processing of a stimulus is modulated by  
196 the phase of the alpha cycle (Bonnefond and Jensen, 2015; Busch et al., 2009; Dugué et al.,  
197 2011; Jensen and Mazaheri, 2010; Mathewson et al., 2009). The direct relationship between  
198 increased alpha power and suppression of processing has been corroborated by the manipula-  
199 tion (entrainment) of parietal alpha oscillations through transcranial magnetic stimulation  
200 (Gooding-Williams et al., 2016; Herring et al., 2015). All-in-all there is substantial evidence  
201 to suggest that inhibition is partly achieved through increased alpha power, whereas an alpha  
202 decrease appears to reflect enhanced attention, suggesting an implication of alpha modulation  
203 in selective attention.

204

205 Accordingly, older adults fail to modulate alpha oscillations to the same extent as younger  
206 adults (Deiber et al., 2013; Hong et al., 2015; Pagano et al., 2015; Vaden et al., 2012) and  
207 consistently display slowed alpha frequency when measuring individual alpha peak frequen-  
208 cies (Pons et al., 2010). In particular, older participants have been shown to fail to modulate  
209 alpha in anticipation of a visual target (Deiber et al., 2013; Zanto et al., 2010), which could be  
210 indicative of a failure to inhibit irrelevant visual distractors (Vaden et al., 2012). However,  
211 failure to modulate alpha oscillations does not seem to consistently result in impaired per-  
212 formance. Older individuals have been found to successfully inhibit visual information de-  
213 spite a failure to modulate alpha (Vaden et al., 2012), possibly indicating the implementation  
214 of alternative compensatory neural mechanisms. Similarly, in a visual spatial attention task,  
215 Hong et al. (2015) found that age-related decreased alpha lateralisation was not associated  
216 with impaired behaviour. Vaden et al. (2012) therefore proposed that age-related changes in  
217 alpha band power and frequency could render alpha modulations redundant. This raises the  
218 question of what alternative mechanisms could be available to the ageing brain that could  
219 compensate for decreased flexibility in the alpha range. One visual attention study by Deiber  
220 et al. (2013) found that rather than a posterior alpha modulation, the older group displayed a  
221 low beta frequency response to cues and targets (conforming to Gross et al., 2004). It could  
222 be that older adults were engaging alternative mechanisms that recruit different frequencies  
223 and/or brain areas to compensate for impaired posterior alpha modulation, a notion that re-  
224 quires further investigation.

225

#### 226 **1.4. Compensatory recruitment or neural noise?**

227 The literature has consistently demonstrated more widely distributed cortical responses in  
228 older compared to younger adults, particularly in frontal regions (Adamo et al., 2003; Lague-  
229 Beauvais et al., 2013; Li et al., 2013; Madden et al., 2007). It has been debated as to whether  
230 this increase in activity spread reflects increased neural noise (Quandt et al., 2016; Welford,  
231 1981) or compensatory recruitment (Fabiani et al., 2006; Madden et al., 2007; Park and  
232 Reuter-Lorenz, 2009; Quandt et al., 2016; Reuter-Lorenz and Cappell, 2008; Reuter-Lorenz  
233 and Park, 2014). In other words, is the wider spread of activity detrimental or beneficial to  
234 functioning?

235

236 The notion of increased neural noise assumes that activation thresholds become more difficult  
237 to reach and, in turn, the focality of neural activation is affected, resulting in a more wide-  
238 spread pattern of activity within and across brain areas (Shih, 2009; Welford, 1981). Similar  
239 to a neural noise hypothesis of neural ageing, Cabeza (2002) proposed a dedifferentiation hy-  
240 pothesis, where ageing results in a decreased specialisation of cortical processing. Enhanced  
241 neural noise or dedifferentiation with increased age (Cabeza, 2002; Huettel et al., 2001;  
242 Polich et al., 1985; Shih, 2009; Welford, 1981) characterises the wider spread of brain activ-  
243 ity as detrimental, thereby providing an explanation for impaired selective attention (Shih,  
244 2009).

245

246 On the contrary and in support of a compensatory recruitment hypothesis of more widely dis-  
247 tributed brain activity in older age, there is cognitive evidence to suggest that older adults are  
248 indeed able to compensate for attentional deficits with top-down control of attention, such as  
249 utilising cues more effectively than younger people in selective attention tasks (McLaughlin  
250 and Murtha, 2010; Neider and Kramer, 2011; Watson and Maylor, 2002). As proposed by the  
251 “Scaffolding Theory of Aging and Cognition” (STAC; Park and Reuter-Lorenz, 2009;  
252 Reuter-Lorenz and Park, 2014), successful compensatory cognitive strategies are likely to  
253 recruit additional neural resources, which could be reflected by a wider distribution of brain  
254 activity – prominently involving brain areas related to top-down control. Accordingly, the  
255 “posterior to anterior shift in ageing hypothesis” (PASA; Davis et al., 2008) proposes that  
256 there is a compensatory shift in activity towards frontal regions in conjunction with declines  
257 in occipital sensory processing. Studies across multiple cognitive paradigms have indeed re-  
258 ported decreases in posterior activity (Buckner et al., 2000; Cabeza et al., 2004; Davis et al.,



259 2008; Huettel et al., 2001; Madden et al., 2002; Ross et al., 1997) and increases in anterior  
260 regions, including the prefrontal cortex (PFC) and parietal regions (Cabeza et al., 2004;  
261 Grady, 2000; Madden, 2007). While controlling for task difficulty, Davis et al. (2008) found  
262 age-related decreases in occipital activity coupled with age-related increases in PFC activity.  
263 Furthermore, cognitive performance positively correlated with increased PFC response. The  
264 widely acknowledged decline in the structure of frontal regions with age makes the PASA  
265 hypothesis counterintuitive (Colcombe et al., 2005; Daigneault et al., 1992; West, 2000;  
266 West, 1996). However, in addition to the vast literature supporting a frontal lobe deterioration  
267 hypothesis of ageing (Colcombe et al., 2005; Daigneault et al., 1992; West, 2000; West,  
268 1996), there is equally vast evidence demonstrating increased activity in the frontal lobe  
269 (Cabeza et al., 2004; Grady, 2000; Madden, 2007) as well as a reduced magnitude and spatial  
270 extent of visual cortex response during visual processing (Buckner et al., 2000; Huettel et al.,  
271 2001; Ross et al., 1997). Furthermore, Colcombe et al. (2005) found that areas with the larg-  
272 est grey matter reductions e.g. middle frontal gyrus (MFG) and superior frontal gyrus (SFG),  
273 also show greatest increases in activity.

274

275 However, inconsistent with the simple formulation of the PASA hypothesis of ageing (Davis  
276 et al., 2008), theta modulations (3-7hz) along the frontal midline have been shown to deterio-  
277 rate with increased age - in both resting state and task related conditions (Cummins and  
278 Finnigan, 2007; Reichert et al., 2016; van de Vijver et al., 2014). Theta is associated with a  
279 broad array of task processes including pre-stimulus top-down cognitive control (Cavanagh et  
280 al., 2009; Cavanagh and Frank, 2014; Min and Park, 2010), target processing (Demiralp and  
281 Başar, 1992), working memory (Sauseng et al., 2010) and selective attention (Green and  
282 McDonald, 2008). Frontal midline theta is thought to reflect medial PFC and ACC activity  
283 (e.g. Asada et al., 1999) which are central to attentional control (Cavanagh et al., 2009;  
284 Cavanagh and Frank, 2014; Konishi et al., 1999; Pollmann, 2004). Functional connectivity  
285 mediated by theta oscillations has been shown to play an important role in attention, error  
286 monitoring and executive function (Cavanagh et al., 2009; Schack et al., 2005; Voloh et al.,  
287 2015; Wang et al., 2016b). For example, Voloh et al. (2015) found increases in theta-gamma  
288 phase-amplitude coupling between ACC and PFC in non-human primates before successful  
289 but not before unsuccessful attentional shifts.

290

291 Age-related reductions in frontal midline theta have most commonly been observed in mem-  
292 ory recall tasks and during resting state, and mostly recorded with electroencephalography

293 (EEG; Cummins and Finnigan, 2007; Reichert et al., 2016; van de Vijver et al., 2014). Al-  
294 though there is an overall reduction in frontal midline theta power with increased age, it could  
295 be that there is an increase in compensatory lateral PFC theta activation that has not been  
296 identified by previous EEG studies due to poor spatial resolution, or which may not be re-  
297 flected in theta power modulation (but in alpha modulations, for instance). More consistent  
298 with a PASA hypothesis of ageing (Davis et al., 2008), Gazzaley et al. (2008) found an in-  
299 crease in frontal midline theta power in older adults when implementing a visual attention  
300 task, consistent with an increase in the implementation of top-down attentional guidance.

301

### 302 **1.5. The current study**

303 In the light of the aforementioned inconsistencies and competing theoretical accounts we set  
304 out to clarify the notion of age-related deficiencies and possible compensatory mechanisms of  
305 attention by investigating modulations of alpha and theta frequency bands during switches  
306 between temporally vs. spatially tuned attention. We used Magnetoencephalography (MEG)  
307 to increase spatial resolution over previous EEG studies, while achieving the necessary tem-  
308 poral resolution for frequency-specific analysis, thus, allowing for oscillatory analysis in  
309 source space.

310

311 The aim of the current study was to investigate the neural mechanisms that reflect age-related  
312 changes in the ability to refocus attention between time and space that has been reported in  
313 our previous behavioural work (Callaghan et al., 2017). Age groups were compared on their  
314 ability to switch from allocating attention in time, in order to identify a single target in an  
315 RSVP stream, to allocating attention spatially to identify a target in a VS display. This reallo-  
316 cation of attention can be conceived of as a switch in attentional focus and we will refer to  
317 increased costs of refocussing (e.g. as reflected by increased RTs) as “Switch-Costs”, al-  
318 though the paradigm employed is not a traditional task-switching paradigm (Callaghan et al.,  
319 2017).

320

321 To manipulate the cost of switching (the attentional focus) from the RSVP stream to the VS  
322 display, the position of the target in the RSVP stream was either the first item in the stream,  
323 towards the end of the stream, or absent from the stream. When the target was the first item in  
324 the stream, participants were no longer required to attend to the stream, and thus no cost of  
325 switching was expected (No-Switch condition). On the contrary, when the target was near the  
326 end of the stream or the stream consisted of only distractor items, participants needed to at-

327 tend to the stream until towards the end of the stream, inducing a cost of switching (Target  
328 Switch condition/No-Target Switch condition). Longer VS RTs were therefore expected  
329 when switching from the RSVP task to the VS in both the Target Switch and No-Target  
330 Switch conditions in comparison to the No-Switch condition. Conforming to our recent be-  
331 havioural work (Callaghan et al., 2017), it was hypothesized that there would be an age-  
332 related increase in the cost of switching from the RSVP task to initiate the VS, which would  
333 be reflected in greater increases in RTs from the No-Switch condition to the two Switch con-  
334 ditions in the older groups in comparison to the youngest group. It is important to note that in  
335 Callaghan et al. (2017) we observed increased Switch-Costs already in the group aged 40-49  
336 years, which informed our current hypothesis that both older groups would differ from the  
337 youngest group (aged 19-30 years). Furthermore, in our novel RSVP-VS paradigm pop-out,  
338 VS performance appeared to be more sensitive to age-related differences than serial VS per-  
339 formance, which was most likely due to the older adults' slowed RTs reaching ceiling point  
340 in the case of serial VS (for details see Callaghan et al., 2017). We therefore decided to em-  
341 ploy pop-out VS only so as to optimise sensitivity to age-related changes in brain oscillations.

342

343 MEG was recorded while participants completed the attention switching task to enable the  
344 investigation of age-related changes in oscillatory neural mechanisms that may explain defi-  
345 cits in switching. Based on previous literature (Gazzaley et al., 2008; Hong et al., 2015;  
346 Reichert et al., 2016; Vaden et al., 2012), it was expected that there would be age-related  
347 changes in alpha and theta oscillations that would explain age group differences in attentional  
348 switching (as reflected by RT increases). It was hypothesised that there would either be an  
349 increase in frontal theta activity reflecting additional top-down compensatory processing  
350 (Davis et al., 2008; Fabiani et al., 2006; Gazzaley et al., 2008; Madden, 2007), or a reduction  
351 in theta power, particularly across the frontal midline as has been demonstrated in previous  
352 EEG studies (Cummins and Finnigan, 2007; van de Vijver et al., 2014), and which might re-  
353 sult from increased activation thresholds due to increased neural noise as a consequence of  
354 age-related deterioration. Based on previous literature it was expected that older adults would  
355 display abnormal alpha modulation, either through a weaker alpha power increase (Vaden et  
356 al., 2012) or through a weaker alpha power decrease (Deiber et al., 2013; Zanto et al., 2011).

357

358 Modulations of theta and alpha source power were hypothesised to correlate with behavioural  
359 measures of RT-Switch-Costs. We expected more widely distributed power modulations in  
360 the older groups compared to the youngest group (Adamo et al., 2003; Lague-Beauvais et al.,

361 2013; Li et al., 2013; Madden et al., 2007). Correlations between Switch-Costs and power  
362 modulation in regions that form this wider distribution would support theories of compensa-  
363 tory recruitment (Cabeza et al., 2018; Fabiani et al., 2006; Madden et al., 2007; Park and  
364 Reuter-Lorenz, 2009; Reuter-Lorenz and Park, 2014). Alternatively, more widely distributed  
365 power modulations without or with negative association with reduced Switch-Costs could  
366 suggest increased neural noise.

367

368 Finally, functional oscillatory connectivity at theta and alpha frequencies was expected to ei-  
369 ther become weaker with increased age, as would be proposed by increased neural noise (de-  
370 creased neural precision) theories of ageing (Shih, 2009; Welford, 1981), or increase with  
371 increased age, as would be expected from compensatory recruitment (Davis et al., 2008;  
372 Fabiani et al., 2006; Madden, 2007). Graph theoretical metrics were expected to reveal  
373 topologies with a more “star-like” structure in the younger adults, reflecting efficient local  
374 connectivity (e.g. in specialised cortical regions), whereas more “chain-like” topologies were  
375 expected to be seen in older adults, reflecting less efficient, longer range connectivity.  
376 Furthermore, graph theoretical metrics were expected to correlate with Switch-Costs, demon-  
377 strating a relationship between network topology and task performance.

378

## 379 **2. Methods**

### 380 **2.1. Participants**

381 Participants were recruited from Aston University staff and students and the community. Par-  
382 ticipants aged over 60 years were also recruited from the Aston Research Centre for Healthy  
383 Ageing (ARCHA) participation panel. Participants provided written informed consent before  
384 participating and were screened for contraindications to having an MRI or MEG scan and re-  
385 ceived standard payment according to local rules. The research was approved by Aston Uni-  
386 versity Research Ethics Committee and complied with the Declaration of Helsinki.

387

388 Sixty-three participants in three age groups (19-30, 40-49, 60+ years; see Table 1 for details)  
389 were included in the final analysis. Note that we began by investigating 60-69 and 70+ years  
390 groups separately, however, given the lack of significant difference in behavioural data and  
391 similarity in neural signatures, it was decided to collapse these into a single 60+ years group  
392 (60-82 years). Participants with visual impairments, photosensitive epilepsy, and a history of  
393 brain injury or stroke were excluded from participation. All participants in the 60+ years  
394 group scored over the 87 cut-off for possible cognitive impairment on the Addenbrookes

395 Cognitive Examination 3 (ACE-3; Noone, 2015). The ACE-3 consists of a series of short  
396 tasks that provide measures of language, memory, attention, fluency and visuospatial abili-  
397 ties. In total 73 participants were tested, but six participants were excluded from analysis due  
398 to low performance accuracy and/or too noisy MEG data resulting in fewer than 30 out of 80  
399 trials remaining for one or more conditions after data pre-processing. These six participants  
400 included one individual aged 40-49 years and five participants aged 60+ years. Two partici-  
401 pants withdrew from the study and in two data sets there was a recording error, one in which  
402 there was an error in the recording of triggers in the raw MEG data and one in which there  
403 was an error in the continuous recording of the head position indicator (HPI) coils. Demo-  
404 graphics for the remaining 63 participants are presented in Table 1.  
405  
406

407 **Table 1. Participant demographics**

|             |        | Age Group (years) |              |            |
|-------------|--------|-------------------|--------------|------------|
|             |        | 19-30 (n=20)      | 40-49 (n=20) | 60+ (n=23) |
| Age (years) | Mean   | 24.6              | 44.95        | 68.61      |
|             | SD     | 2.96              | 3.28         | 5.43       |
| Gender      | Male   | 08                | 07           | 10         |
|             | Female | 12                | 13           | 13         |
| Handedness  | Right  | 16                | 19           | 22         |
|             | Left   | 04                | 01           | 01         |
| ACE-3       | Mean   | n/a               | n/a          | 95.5       |
|             | SD     | n/a               | n/a          | 2.69       |

408 This table presents the demographics for each age group, including participants' mean age, the num-  
409 ber of participants who are male and female, the number of participants who are left and right handed,  
410 in addition to the mean ACE-3 scores for the 60+ years group.  
411

## 412 **2.2. Materials and procedures**

### 413 **2.2.1. Attention switching task and MEG recordings**

414 The attention switching paradigm from Callaghan et al. (2017) was adapted for use with  
415 MEG (see Figure 1). The major change to the MEG paradigm was to reduce the number of  
416 conditions while increasing the number of trials in each condition (for the required signal-to-  
417 noise ratio for MEG analysis), by focusing only on pop-out VS, since Callaghan et al. (2017)  
418 had reported performance ceiling effects for serial VS. On each experimental trial partici-  
419 pants attended to an RSVP stream first before switching to a pop-out VS display. Each trial  
420 consisted of a fixation cross, presented for 2000ms, followed by the RSVP stream, which was  
421 immediately followed by the VS display. E-Prime 2.0 Professional (Psychology Software  
422 Tool. Inc.) was used on a windows PC to present stimuli, record responses, and send triggers  
423 to the MEG through a parallel port (at the onsets of RSVP, target (if applicable), and VS dis-  
424 play, as well as upon response to VS). Stimuli were back-projected onto a screen inside a  
425 magnetically shielded room (MSR) approximately 86cm in front of the participant at a reso-  
426 lution of 1400×1050. All stimuli were presented in black (RGB 0-0-0) on a grey background  
427 (RGB 192-192-192).

428

429 The RSVP stream consisted of a rapidly changing stream of letters in the centre of the dis-  
430 play. There were ten items in each RSVP stream, each presented for 100ms with no inter-  
431 stimulus interval. Stimuli were presented in font size 30pt (0.75×0.75cm, 0.78°). On two

432 thirds of the trials, one of the items in the stream was a target, namely a digit  
433 (1/2/3/4/6/7/8/9), which participants were expected to detect and memorise for report at the  
434 end of the trial (after the VS). The target could be either the first stimulus of the stream (re-  
435 moving the need to attend to the stream) or the seventh or ninth item in the stream of ten  
436 stimuli. In the remaining one third of the trials the RSVP contained only letters and no target  
437 digit. Due to its visual similarity to the letter S, '5' was excluded from the pool of targets.  
438 Based on their visual similarity to certain numbers, letters I, O, and S were excluded from the  
439 stream. Letters K and Z were the pre-defined targets for the VS task and were therefore also  
440 not employed as distractors in the RSVP. It should be noted that the current RSVP task dif-  
441 fers from a standard attentional blink paradigm as the RSVP stream could only contain a  
442 maximum of a single target.

443

444 The VS display consisted of eight letters presented in a circle around a fixation cross in the  
445 centre of the screen, including seven distractors and one target. The target letter was always  
446 either a 'K' or a 'Z' and distractors were always a 'P', rendering a "pop-out" VS, conforming  
447 to effects observed by Callaghan et al. (2017; see Introduction for details). Stimuli were pre-  
448 sented in font size 20pt (0.50×0.50cm, 0.52°) and the centre of each stimulus was 2.3cm  
449 (2.40°) from the centre of the fixation cross.

450

451 Participants were seated comfortably with each of their fingers resting on one of eight buttons  
452 on a response pad that was placed in front of them. Participants pressed a button with their  
453 right index finger once they had identified the VS target. Note that conforming to Callaghan  
454 et al (2017) this button press did not discriminate between K or Z, but merely indicated that  
455 the participant had identified the target on that trial. Participants' RTs to press this button  
456 were recorded and allowed for a more accurate and less variable search time estimate than a  
457 discriminative response (for detailed discussion see Callaghan et al., 2017). For MEG it had  
458 the added benefit that this response did not trigger different neural motor patterns (e.g. for  
459 different finger taps). Subsequently, participants pressed a button to indicate whether it was a  
460 'K' (right index finger response) or a 'Z' (left index finger response) in the display. Partici-  
461 pants were then prompted to indicate whether they had seen a target digit in the RSVP stream  
462 (yes: right index finger response; no: left index finger response). If a digit was correctly de-  
463 tected in the RSVP stream, participants then pressed the button that corresponded with the  
464 number that they saw. Participants wore earphones through which a 'ding' sound was played  
465 after a correct response and a chord sound was played after an incorrect response. Accuracy

466 throughout the task was recorded. Participants were instructed to keep their eyes fixed on the  
467 cross at the centre of the screen while they completed the VS and to respond as quickly as  
468 possible.

469

470 To manipulate the cost of switching, the position of the target in the RSVP stream that pre-  
471 ceded the VS was either the first item in the stream (No-Switch condition) or the target was  
472 either the seventh or ninth item in the stream (Target Switch condition) or absent from the  
473 stream (No-Target Switch condition). Illustrations of the RSVP stream and of the VS display  
474 are presented in Figure 1.

475

476 There were 80 trials of each of the three conditions (No-Switch/Target Switch/No-Target  
477 Switch), with a total of 240 trials. To provide the opportunity for breaks, trials were divided  
478 into ten blocks. Trials were randomized within blocks. Participants completed 24 practice tri-  
479 als before starting the experimental trials.

480

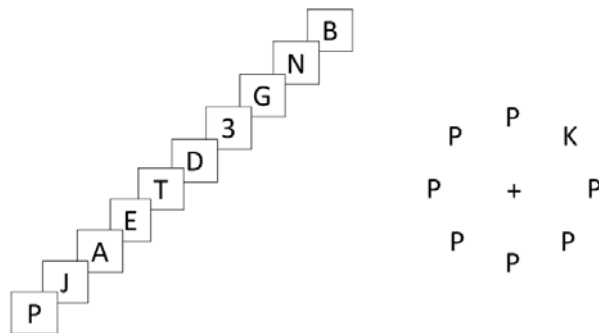

481

482 Figure 1. Illustration of examples of the stimuli set up. The RSVP stream illustration (left)  
483 displays a Target Switch RSVP stream. Each trial consisted of a fixation cross (2000ms) fol-  
484 lowed by an RSVP stream immediately followed by a pop-out VS display (right).

485

486 MEG data were recorded with a 306-channel Elekta Neuromag system (Vectorview, Elekta,  
487 Finland) in a magnetically shielded room at a sampling rate of 1000Hz. The 306 sensors were  
488 made up of 102 triplets incorporating one magnetometer and two orthogonal planar gradiom-  
489 eters. Data were recorded in two halves within the same session.

490

491 Head position was recorded continuously throughout data acquisition via the location of five  
492 HPI coils. Three HPI coils were positioned across the participant's forehead and one on each  
493 mastoid. The position of each HPI coil, three fiducial points, and 300-500 points evenly dis-  
494 tributed across the head surface were recorded prior to the MEG recording with Polhemus



495 Fastrak head digitisation. A T1 structural MRI was obtained for each participant, acquired  
496 using a 3T Siemens MAGNETOM Trio MRI scanner with a 32-channel head coil.

497

### 498 **2.3. Data analysis**

#### 499 **2.3.1. Response times**

500 Participants' median VS RTs (ms) on trials where both VS and RSVP responses were correct  
501 were extracted. Participants' proportions of correct VS target identifications and RSVP target  
502 identifications were also extracted.

503

504 Differences in median VS RTs between age groups and RSVP conditions were analysed in a  
505  $3 \times 3$  mixed ANOVA, where RSVP condition (No-Switch/Target Switch/No-Target Switch)  
506 was a within subjects factor and age group (19-30, 40-49, 60+ years) was a between subjects  
507 factor. Multiple comparisons were corrected for with Bonferroni correction.

508

509 The data were expected to violate assumptions of equality of variance due to increases in in-  
510 ter-individual variability with age (Hale et al., 1988; Morse, 1993), yet, there is evidence to  
511 support that ANOVA is robust to violations of homogeneity of variance (Budescu, 1982).  
512 Levene's test for equality of variance is therefore not reported. Where Mauchly's Test of  
513 Sphericity was significant, indicating that the assumption of sphericity had been violated,  
514 Greenhouse-Geisser corrected statistics were reported.

515

516 To further explore the age group  $\times$  RSVP condition interactions, "Switch-Costs" were calcu-  
517 lated as the percentage difference in RTs between Target Switch and No-Switch conditions  
518 (Target Switch-Costs) and between No-Target Switch and No-Switch conditions (No-Target  
519 Switch-Costs) for each individual. Independent t-tests were implemented to compare age  
520 groups' Switch-Costs. It is important to note that t-tests were exploratory rather than hy-  
521 pothesis driven, and hence Restricted Fisher's Least Significant Difference test was applied  
522 and corrections for multiple comparisons were not conducted (Snedecor and Cochran, 1967).  
523 Where Levene's test for equality in variance was significant ( $p < .05$ ) when computing t-tests,  
524 'Equality of variance not assumed' statistics were reported.

525

#### 526 **2.3.2. MEG**

527 MEG data were preprocessed in Elekta software using MaxFilter (temporal signal space sepa-  
528 ration (tSSS), .98 correlation) to remove noise from sources inside and outside the sensor ar-

529 ray. Seventeen participants displayed magnetic interference from dental work and so a tSSS  
530 correlation of .90 was applied instead. This included five participants from the 19-30 years  
531 group, six from the 40-49 years group and six from the 60+ years group. Movement correc-  
532 tion was applied to one participant in the 40-49 years group due to head movement (>7mm).

533

534 Data were read into the Matlab® toolbox Fieldtrip (Oostenveld et al., 2011), band-pass fil-  
535 tered between 0.5 - 85Hz and epoched from 3.5s preceding VS onset (i.e. 2.5s preceding  
536 RSVP stream onset) to 2.0s after the onset of the VS display. Trials were visually inspected  
537 for artefacts and any noisy trials were removed.

538

### 539 Sensor level analysis

540 For data cleaning independent components analyses (ICA) were implemented for each par-  
541 ticipant, across all conditions and components with eye blink or heartbeat signatures were  
542 removed from the data. Noisy MEG channels were interpolated with averaged signal from  
543 neighbouring sensors. Time-frequency analysis was carried out on signals from the planar  
544 gradient representation of 102 gradiometer pairs using a Hanning taper from 2-30Hz (for  
545 every 1Hz), with four cycles per time-window in stages of 50ms. For each participant trials  
546 were averaged within each condition (No-Switch/Target Switch/No-Target Switch).

547

548 Two-tailed dependent t-tests were carried out to compare each of the switch conditions (Tar-  
549 get Switch/No-Target Switch) with the No-Switch condition separately for each age group.  
550 Multiple comparisons were corrected for using non-parametric cluster permutations (Maris  
551 and Oostenveld, 2007).

552

553 Second level analysis was carried out by pre-calculating Switch-Costs for each participant, by  
554 subtracting the No-Switch condition from each of the Switch conditions separately. Pre-  
555 calculated Switch-Costs were then compared at group level (Bögels et al., 2014; Wang,  
556 Callaghan, Gooding-Williams, McAlliste, & Kessler, 2016) by entering differences into two  
557 two-tailed independent cluster permutation t-tests (2000 permutations) to compare age groups  
558 (19-30 years vs 40-49 years/19-30 years vs 60+ years).

559

### 560 Source level analysis

561 For the source level analysis noisy sensors were excluded. Due to size restrictions of the  
562 MEG data file, each data set was recorded in two halves within the same session and were

563 therefore MaxFiltered separately prior to concatenating the data, which could lead to different  
564 components being removed in each half of data. To reduce potential artefacts due to applying  
565 Maxfiltering to the two halves of data separately, a principle components analysis was im-  
566 plemented to reduce data dimensionality to components that accounted for 99% of the vari-  
567 ance.

568

569 Using an in house Matlab script and Elekta software MRI Lab, individual MRIs were aligned  
570 with the sensor array, by aligning the individual's MRI with the fiducial positions and head  
571 shape that were recorded with Polhemus Fastrak head digitisation. Individual single-shell  
572 head-models (5mm voxels) were created from these coregistered MRIs. Head-models were  
573 normalised to MNI space (Montreal Neurological Institute template).

574

575 Time-frequency tiles were selected based on the results from the sensor level analysis. To  
576 localise sources of theta (3-5Hz; 550-1550ms) and upper alpha (10-14Hz; 450-950ms) oscil-  
577 lations, two separate Dynamic Imaging of Coherent Sources (DICS; Gross et al., 2001) beam-  
578 formers were implemented. Spatial filters were calculated based on cross-spectral densities  
579 obtained from the fast-fourier-transform (FFT) of signals from 204 gradiometers using a  
580 Hanning taper, spectral smoothing of +/-2Hz and 2.0s of data padding.

581

582 Two-tailed dependent t-tests were carried out to compare each of the Switch conditions (Tar-  
583 get Switch/No-Target Switch) with the No-Switch condition separately for each age group.  
584 Multiple comparisons were corrected for with non-parametric cluster permutations (Maris  
585 and Oostenveld, 2007).

586

587 Consistent with the sensor level analysis, second level analysis was carried out by comparing  
588 Switch-Costs at the group level (Bögels et al., 2014; Wang, Callaghan, Gooding-Williams,  
589 McAlliste, & Kessler, 2016). For each participant the No-Switch condition was subtracted  
590 from each of the Switch conditions separately. These differences were entered into two two-  
591 tailed independent cluster permutation t-tests (2000 permutations) to compare age groups  
592 (19-30 years vs 40-49 years/19-30 years vs 60+ years).

593

594 To explore the relationship between behavioural performance and power changes in theta and  
595 alpha frequencies, differences in power (at peaks of each significant cluster of the source  
596 analysis) between each of the Switch conditions and the No-Switch condition in theta and

597 alpha power were entered into Spearman's correlation analysis with behavioural RT-Switch-  
598 Costs. An explanation of how RT-Switch-Costs were calculated is provided in Section 2.3.1.  
599 Correlation analyses were exploratory and so multiple comparisons were not corrected for,  
600 however analyses were related to hypotheses and will inform future research trajectories.

601

### 602 Connectivity

603 Functional connectivity between each pair of 116 parcellated cortical and subcortical atlas  
604 regions (Automated Anatomical Labelling; AAL; Tzourio-Mazoyer et al., 2002) was esti-  
605 mated with weighted Phase Lag Index (wPLI; Vinck et al., 2011). WPLI measures the extent  
606 that phase leads or lags between two signals. Findings show that wPLI is both less sensitive  
607 to noise and less vulnerable to the estimation of spurious connectivity due to volume conduc-  
608 tion compared to measures of phase locking value, phase lag index and imaginary coherence,  
609 due to the suppression of zero-phase lag synchrony and weighting estimates of phase lag con-  
610 sistence with the magnitude of the imaginary part of coherence (Vinck et al., 2011). Spatial  
611 filters for each of the 116 regions were computed with a linearly constrained minimum vari-  
612 ance (LCMV) beamformer (Van Veen et al., 1997). Separately for each trial, spatial filters  
613 were applied to the raw data to compute virtual electrodes for each condition for each of the  
614 116 regions. Fourier analysis was computed (with a Hanning taper) from the virtual elec-  
615 trodes between 0.0-2.0s from 2-16Hz. Consistent with source analyses, data at 3-5Hz (0.55-  
616 1.55s) and 10-14Hz (0.45-0.95s) were selected for further analysis. WPLI values were aver-  
617 aged across time and frequencies.

618

619 To investigate whether there were any changes in the extent of network connectivity between  
620 Switch and No-Switch conditions, 116×116 wPLI matrices were entered into non-parametric  
621 Network Based Statistics analysis (NBS; Zalesky et al., 2010). NBS analysis controls for the  
622 multiple comparisons problem through cluster permutation analysis. Instead of clustering  
623 based on spatial information, clustering is performed on network based information. Clusters  
624 were formed from connected edges that exceed a selected  $t$ -threshold when compared across  
625 groups. A null distribution was derived from 5000 permutations to determine the probability  
626 that group differences in the extent of the network was greater than by chance ( $p < .05$ ). Two-  
627 tailed hypotheses were evaluated.

628

629 The output of NBS is highly sensitive to the  $t$ -threshold selected, with lower  $t$ -thresholds  
630 passing a greater number of edges into the network. The selection of  $t$ -threshold is arbitrary

631 (Nelson et al., 2017; Verstraete et al., 2011; Ye et al., 2014; Zalesky et al., 2012; Zalesky et  
632 al., 2010). Although all  $t$ -values selected in the current analysis met the criteria of  $p < .05$ , con-  
633 sistent with Nelson et al. (2017) a range of  $t$ -thresholds were sampled ( $t$ -thresholds 2.1-5.0) to  
634 understand the implications of thresholding on resulting networks. The range of thresholds at  
635 which clusters were significant are reported in Figures 9-12.

636

637 Consistent with the statistical comparisons of power, to explore the interaction between  
638 RSVP condition and age, age groups were compared on the differences between Switch and  
639 No-Switch conditions. To enable us to compare age groups on the networks that were strong-  
640 est for each condition, when calculating differences between conditions for each participant  
641 the No-Switch wPLI matrix was subtracted from the Target Switch wPLI matrix and in a  
642 separate analysis the Target Switch wPLI matrix was subtracted from the No-Switch wPLI  
643 matrix. In each output negative values were set to zero. This allowed us to first compare age  
644 groups on the networks that were stronger in the Target Switch than the No-Switch condition,  
645 followed by comparing age groups on networks that were stronger in the No-Switch than the  
646 Target Switch condition. The same procedure was applied to compare No-Target Switch and  
647 No-Switch conditions.

648

649 To further characterise networks that significantly differed between age groups, nodes were  
650 categorised into eight anatomical regions (frontal, occipital, parietal, temporal and hippocam-  
651 pal, cerebellum, insula, striatum, thalamus), consistent with Verdejo-Román et al. (2017) and  
652 Ye et al. (2014). It should be noted that the total number of connections incorporated in each  
653 network is determined by the arbitrary  $t$ -threshold selected in the NBS analysis and each net-  
654 work has a different total number of nodes and edges (Nelson et al., 2017; Verstraete et al.,  
655 2011; Zalesky et al., 2012; Zalesky et al., 2010). The aim of the matrix plots is to better char-  
656 acterise which cortical regions are most strongly connected in each network.

657

### 658 Minimum Spanning Trees (MST)

659 To explore age group differences in the topology of Switch and No-Switch networks  
660 Kruskal's algorithm (Kruskal, 1956) was applied to the 116×116 wPLI matrices to construct  
661 an MST for each RSVP condition for each age group. MST is a graph theoretical approach  
662 that enables the comparison of network topologies while controlling for the number of nodes  
663 (i.e. atlas regions) and edges in a network and avoiding the requirement to select an arbitrary  
664 threshold (Tewarie et al., 2014). Networks that contain different numbers of nodes and/or

665 edges bias graph theoretical metrics such as degree and path length. A more detailed discus-  
666 sion of MST analysis can be found in Tewarie et al. (2014).

667

668 From the MST, two global metrics, mean eccentricity and leaf fraction, were extracted. Mean  
669 eccentricity was computed to provide an indication of the topology of all paths in the net-  
670 work. Lower mean eccentricity values signify that the network is characterised by efficient  
671 local connectivity, whereas higher values signify that on average nodes have longer path  
672 lengths to other nodes. Leaf fraction is the proportion of nodes in the network that are con-  
673 nected to only one other node. Higher leaf fraction implies that networks are characterised by  
674 efficient local connectivity directly between nodes, where most nodes would have at least two  
675 “neighbours”, rather than a network characterised by chain-like, long range connectivity  
676 (Tewarie et al., 2014; Tewarie et al., 2015).

677

678 Global metrics, mean eccentricity and leaf fraction, were analysed in SPSS 21. To investigate  
679 the effects of age and RSVP condition on overall network topology, four 3×3 (age group ×  
680 RSVP condition) ANOVAs were performed on leaf fraction and mean eccentricity for alpha  
681 and theta MSTs. RSVP condition (No-Switch/Target Switch/No-Target Switch) was a within  
682 subjects factor and age group (19-30, 40-49, 60+ years) was a between subjects factor. Multi-  
683 ple comparisons were corrected for with Bonferroni correction. To further explore the inter-  
684 actions between independent variables that were identified from the ANOVA on alpha MST  
685 mean eccentricity independent t-tests were implemented to compare age groups on mean ec-  
686 centricity separately for each RSVP condition. Consistent with the RT analysis, Levene’s test  
687 for equality of variance is not reported (Budescu, 1982; Budescu and Appelbaum, 1981).  
688 Where Mauchly’s Test of Sphericity was significant, indicating that the assumption of  
689 sphericity has been violated, Greenhouse-Geisser corrected statistics were reported. Local  
690 MST metrics are reported in the SM.

691

692 Global MST metrics in which significant group differences were found were entered into  
693 Spearman’s correlation analysis with Target and No-Target Switch-Costs. Correlation analy-  
694 ses were exploratory and so multiple comparisons were not corrected for, however were re-  
695 lated to hypotheses.

696

### 697 3. Results

#### 698 3.1. Attention switching task RTs

699 All groups correctly identified over 96% of VS targets in all three conditions. Thus, no fur-  
700 ther analysis was carried out on VS accuracy. All groups correctly identified over 73% of  
701 RSVP targets in both RSVP conditions. RSVP accuracy was unrelated to the aims and hy-  
702 potheses of the current study and no further analysis was carried out on RSVP accuracy. The  
703 proportion of correct RSVP target identifications in the two Target conditions are presented  
704 in Figure SM1 in the SM. Group means of participants' median VS RTs are presented in Fig-  
705 ure 2.

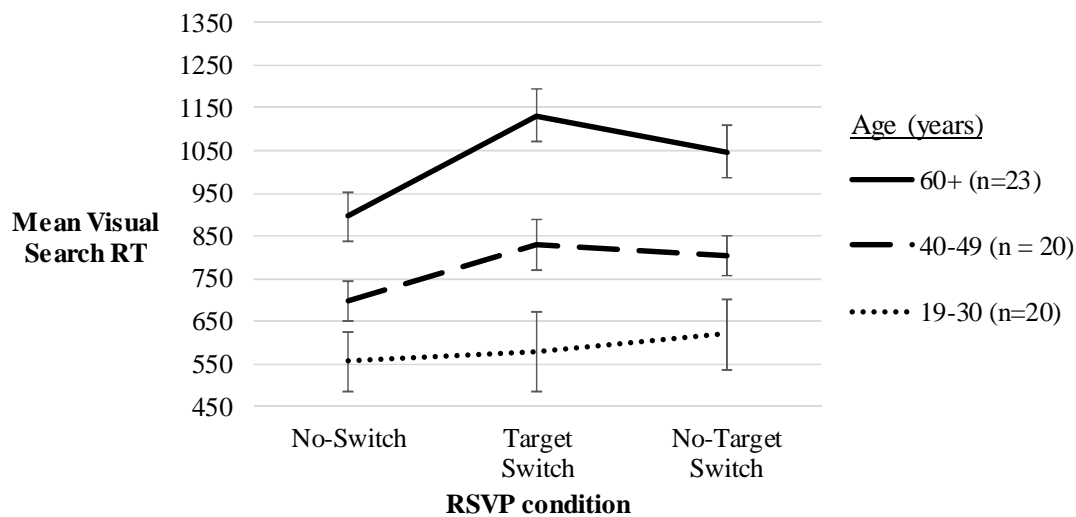

706

707 Figure 2. Group means of participants' median VS RTs. Vertical bars represent the SE.

708

709 The  $3 \times 3$  (RSVP condition  $\times$  age group) mixed ANOVA on participants' median VS RTs  
710 revealed a significant main effect of age ( $F(2, 60)=11.36, p<.001, \eta^2_p=.28$ ), a significant main  
711 effect of RSVP condition ( $F(2,120)=35.21, p<.001, \eta^2_p=.37$ ) and a significant interaction be-  
712 tween age and RSVP condition ( $F(4,120)=7.05, p<.001, \eta^2_p=.19$ ).

713

714 Post hoc comparisons revealed that the main effect of age resulted from significantly slower  
715 RTs in the 60+ years group in comparison to both the 19-30 ( $p<.001$ ) and 40-49 years  
716 ( $p=.029$ ) groups. There was no significant difference between the 19-30 and 40-49 years  
717 groups ( $p>.10$ ).

718

719 The main effect of RSVP condition resulted from significantly slower RTs in both the Target  
720 Switch ( $p<.001$ ) and No-Target Switch ( $p<.001$ ) conditions in comparison to the No-Switch

721 condition. There was no significant difference in RTs between the Target Switch and No-  
722 Target Switch conditions ( $p>.10$ ).

723

724 To investigate the hypothesis that there would be significantly greater Switch-Costs in both  
725 the 40-49 and 60+ years groups in comparison to the 19-30 years group, and to further ex-  
726 plore the interaction between age and RSVP condition, independent t-tests were carried out  
727 comparing Switch-Costs across age groups. Please refer to Methods (Section 2) for a descrip-  
728 tion of how Switch-Costs were calculated for each participant. Means and SDs of partici-  
729 pants' Switch-Costs are presented in Table 2.

730

731 Target Switch-Costs were significantly greater in both the 40-49 ( $df=38$ ,  $t=-3.45$ ,  $p<.001$ ) and  
732 60+ ( $df=41$ ,  $t=-5.15$ ,  $p<.001$ ) years groups in comparison to the 19-30 years group. There  
733 were no significant age group differences in No-Target Switch-Costs ( $p>.10$ ).

734

735 The RT results replicated findings from Callaghan et al. (2017) by demonstrating deficits in  
736 switching in both the 40-49 years and 60+ years groups in comparison to the 19-30 years  
737 group. Consistent with Callaghan et al. (2017), greater Switch-Costs in the older age groups  
738 were only significant when participants were required to process a target digit before switch-  
739 ing. When there was no target in the RSVP stream older participants seem better able to cope  
740 with switching from temporal to spatial attention, suggesting either the availability of more  
741 processing resources and/or differences in strategies used to switch under this increased de-  
742 mand of target consolidation. To improve our understanding of the cognitive strategies used  
743 to switch between modalities of attention across the three age groups, in the following sec-  
744 tions we will investigate group differences in task related oscillatory signatures, in both MEG  
745 power and functional connectivity analyses.

746

747 **Table 2. Means and SDs of Switch-Costs for each age group**

|                        |      | Age group (years) |        |        |
|------------------------|------|-------------------|--------|--------|
|                        |      | 19-30             | 40-49  | 60+    |
|                        |      | (n=20)            | (n=20) | (n=23) |
| Target Switch-Costs    | Mean | 4.02              | 19.67  | 26.65  |
|                        | SD   | 12.72             | 15.78  | 15.67  |
| No-Target Switch-Costs | Mean | 12.59             | 17.29  | 17.98  |



---

|    |       |       |       |
|----|-------|-------|-------|
| SD | 15.24 | 15.66 | 18.43 |
|----|-------|-------|-------|

---

748

749 **3.2. MEG results**

750 Frequencies from 2-30Hz were explored. From the TFRs presented in Figure 3, frequency  
751 bands of 3-5Hz (lower theta) and 10-14Hz (upper alpha) were selected to enter into cluster-  
752 based permutation analysis of time-frequency sensor data and source power. Note that al-  
753 though group differences were also present in the beta frequency band (15-25hz), given the  
754 evidence for impaired inhibition (Adamo et al., 2003; Gazzaley et al., 2008; Greenwood and  
755 Parasuraman, 1994; Hasher and Zacks, 1988; Lustig et al., 2007; Maciokas and Crognale,  
756 2003) and deficits in alpha modulation (Deiber et al., 2013; Hong et al., 2015; Pagano et al.,  
757 2015; Vaden et al., 2012) in older age, and the link between alpha oscillations and inhibition  
758 within selective attention (Capotosto et al., 2009; Hanslmayr et al., 2007; Hanslmayr et al.,  
759 2005; Klimesch et al., 2007; Sauseng et al., 2005; Thut et al., 2006; Yamagishi et al., 2003),  
760 we focused only on alpha frequency throughout the analysis. Time windows entered into  
761 source analysis were selected based on the latencies of effects observed in cluster based per-  
762 mutation analysis of time-frequency sensor data.

763

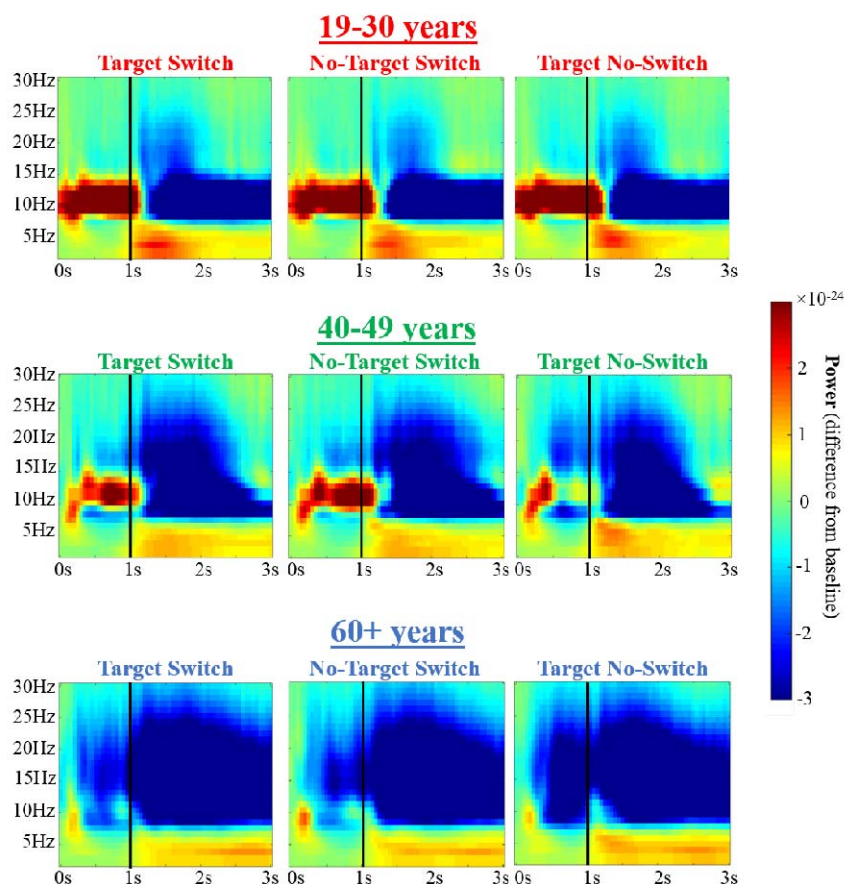

764

765 Figure 3. TFRs present power in relation to a baseline period of -0.6s - -0.01s in a group of  
766 four posterior gradiometer pairs. The onset of the RSVP stream occurred at 0.0s. Black lines  
767 placed over TFRs indicate the onset of the VS display, and RSVP target onset occurred at  
768 either 0.7 or 0.9s.

769

### 770 **3.2.1. Theta power (in sensor and source space)**

#### 771 Target Switch vs No-Switch

772 Statistical results comparing theta power in Target Switch and Target No-Switch conditions  
773 in sensor and source space, and exploring the interaction between RSVP condition and age  
774 group, are presented in Figure 4 (at sensor level as topographies of significant clusters and in  
775 source space as significant clusters mapped onto an anatomical head-model. For details see  
776 Methods, Section 2).

777

## Theta (3-5Hz): Target Switch vs. No-Switch

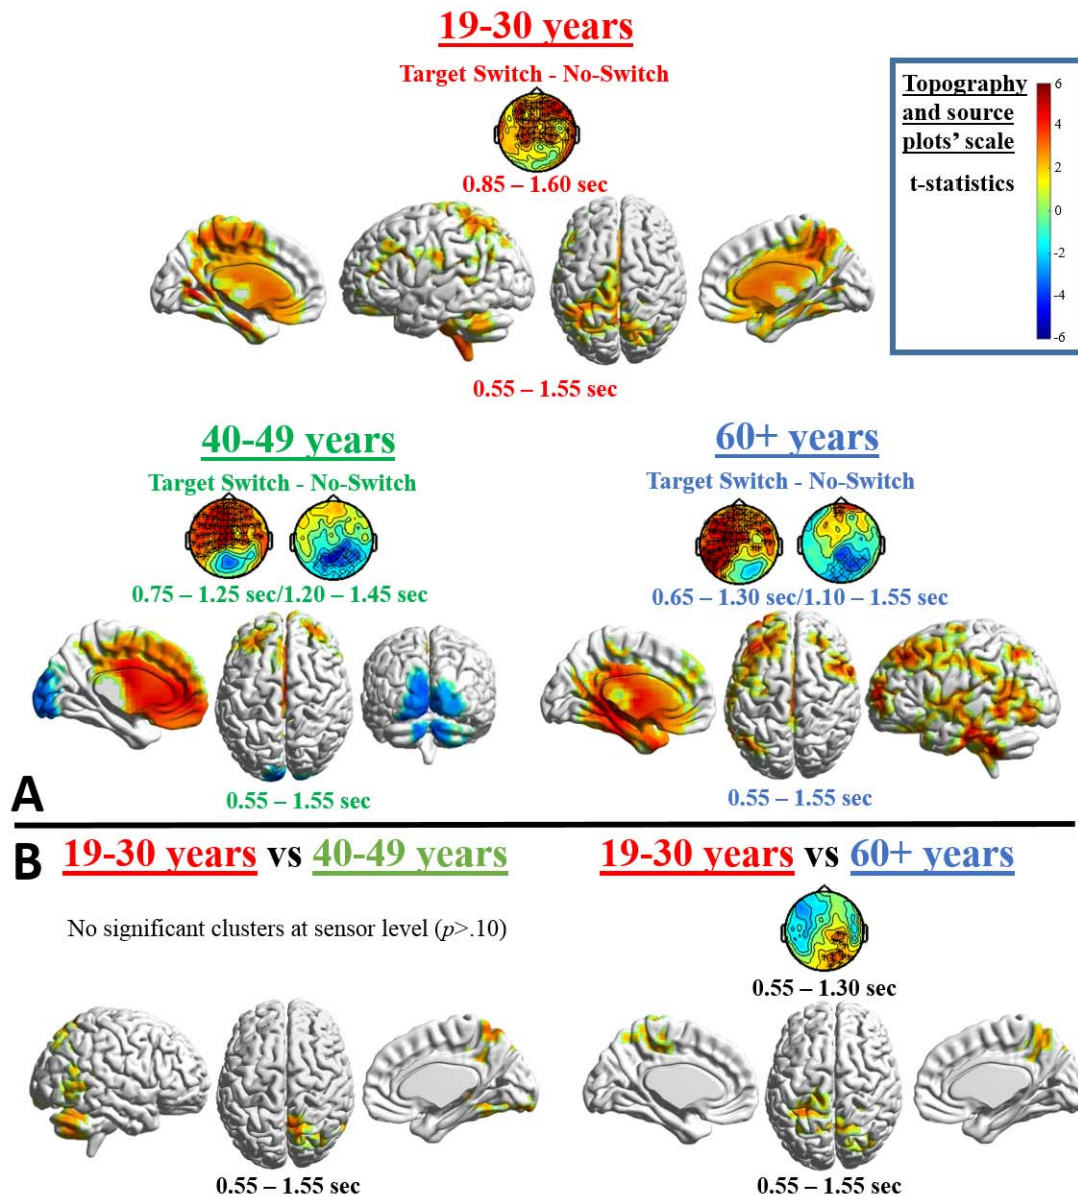

778

779 Figure 4. Effects in lower theta (3-5Hz) when contrasting Target Switch and No-Switch conditions in each age group (panel A) and when exploring the Target Switch condition  $\times$  age  
780 interaction (panel B). Topographical (sensor level clusters) and source plots present  $t$ -  
781 statistics of significant clusters ( $p < .05$  in sensor plots, indicated by asterisks and  $p < .025$  in  
782 source plots).  
783

784

785 The TFRs in Figure 3 illustrate that there was a theta increase in response to the VS display  
786 onset in all conditions. All age groups displayed a significantly higher theta increase in the  
787 Target Switch condition in comparison to the No-Switch condition, which localised to supe-  
788 rior and inferior parietal gyri, occipital gyri, and the MFG in the 19-30 years group, bilateral

789 frontal cortex and the ACC in the 40-49 years group and the SFG, temporal gyri and the  
790 cerebellum in the 60+ years group (Figure 4A). Whereas the 19-30 years group displayed  
791 higher theta in parietal regions, the two older groups demonstrated more extensive frontal re-  
792 cruitment. The 60+ years group displayed higher temporal lobe theta that was not present in  
793 the two younger groups. The two older groups additionally presented with posterior negative  
794 clusters, which reflect lower theta in the Target Switch condition in comparison to the No-  
795 Switch condition, and localised to occipital regions in the 40-49 years group. No significant  
796 negative cluster was seen in the 60+ years group in source space, however, this could be due  
797 to the limited sensitivity of cluster permutation analyses when localising both positive and  
798 negative clusters in source space.

799

800 Age group comparisons of differences between Target Switch and No-Switch conditions,  
801 which are presented in Figure 4B, confirmed that the higher theta increase in the Target  
802 Switch condition was significantly greater in the 19-30 years group in parietal regions in  
803 comparison to both the 40-49 and 60+ years groups.

804

#### 805 No-Target Switch vs No-Switch

806 Results of statistical comparisons of No-Target Switch and No-Switch theta power and inves-  
807 tigations of the interaction between RSVP condition and age group, are presented in Figure 5.

## Theta (3-5Hz): No-Target Switch vs. No-Switch

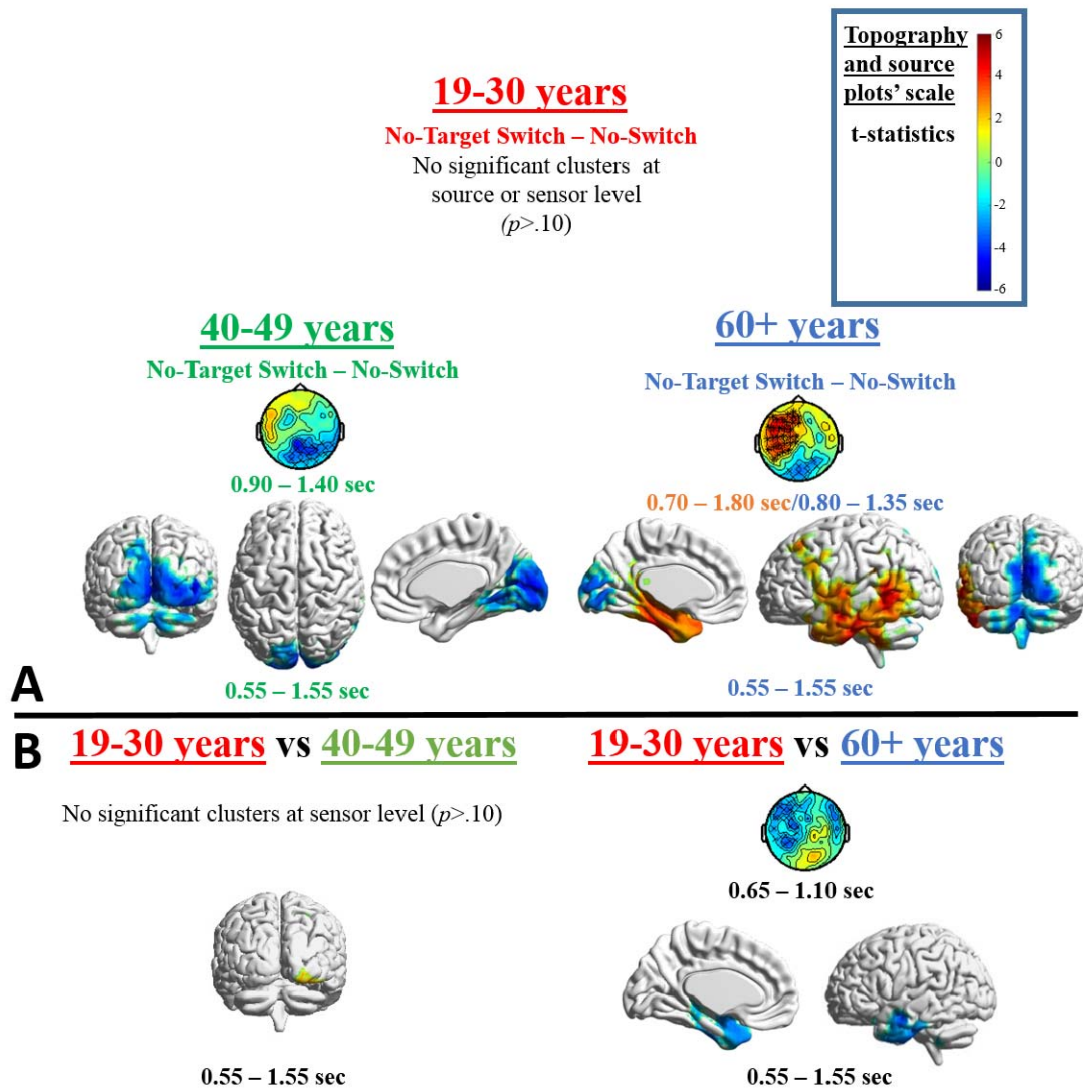

808

809 Figure 5. Effects in lower theta (3-5Hz) when contrasting No-Target Switch and No-Switch  
810 conditions in each age group (panel A) and when exploring the No-Target Switch condition  $\times$   
811 age interaction (panel B). Topographical (sensor level clusters) and source plots present  $t$ -  
812 statistics of significant clusters ( $p < .05$  in sensor plots, indicated by asterisks and  $p < .025$  in  
813 source plots).

814

815 There was no significant difference between No-Target Switch and No-Switch conditions in  
816 theta frequency in the 19-30 years group, suggesting that the differences observed in theta  
817 between Target Switch and No-Switch conditions in this age group were a result of process-  
818 ing the RSVP target in the Target Switch condition.

819

820 In contrast, both the 40-49 and 60+ years groups again display negative clusters that localise  
821 to the occipital lobes, indicating deficient theta increases in the No-Target Switch condition, a

822 finding that cannot be due to RSVP target processing. The 60+ years group again showed  
823 higher theta in the No-Target Switch condition in comparison to the No-Switch condition that  
824 localised to frontal regions and the left temporal lobe.

825

826 In summary, the 19-30 years group showed higher theta power related to a Target Switch in  
827 parietal regions in comparison to the two older groups, however this increase seems to be re-  
828 lated to RSVP target processing, as no significant difference in theta was seen between No-  
829 Target Switch and No-Switch conditions in the 19-30 years group. The left IPS has been  
830 shown to participate in both top-down and bottom-up mechanisms of attentional control  
831 (Imaruoka et al., 2003) suggesting that younger adults may implement more efficient atten-  
832 tional mechanisms during RSVP target detection compared to older adults.

833

834 Both the 40-49 and 60+ years groups showed significantly lower occipital theta in both  
835 Switch conditions (in comparison to the No-Switch condition), which was contrary to the 19-  
836 30 years group. It could be that occipital theta deficits in the two Switch conditions are a re-  
837 flection of deficient attentional guidance, where attention fails to modulate the temporal and  
838 spatial dynamics of activity in feature-coding neuronal populations (Bundesen et al., 2005),  
839 possibly contributing to the increased VS RTs observed in the two older groups after switch-  
840 ing. Within the Dehaene et al. (2006) framework, this deficient attentional guidance in visual  
841 processing regions could be related to parietal theta deficits (Figure 4B).

842

843 The 60+ years group additionally showed significantly higher frontal and temporal theta in  
844 the two Switch conditions in comparison to the No-Switch condition, and the 40-49 years  
845 group showed higher frontal theta in the Target Switch condition. It could be that this addi-  
846 tional recruitment of the frontal cortex reflects the two older groups recruiting additional re-  
847 sources and relying more on top-down attentional control (McLaughlin and Murtha, 2010;  
848 Neider and Kramer, 2011; Watson and Maylor, 2002). The additional recruitment of temporal  
849 gyri in the 60+ years group may indicate the implementation of further strategies to cope with  
850 task demands, such as enhanced episodic memory encoding (Schacter and Wagner, 1999) or  
851 silent vocalisation (Graves et al., 2007; Hickok and Poeppel, 2007; Hocking and Price, 2009;  
852 Smith et al., 1998).

853

854 **3.2.2. Alpha power (in sensor and source space)**

855 Target Switch vs No-Switch

856 Figure 6 presents the statistical results that compare alpha power in Target Switch and No-Switch conditions in sensor and source space (panel A), as well as the interaction between  
857 Switch conditions in sensor and source space (panel A), as well as the interaction between  
858 RSVP condition and age group (panel B).

**Alpha (10-14Hz): Target Switch vs. No-Switch**

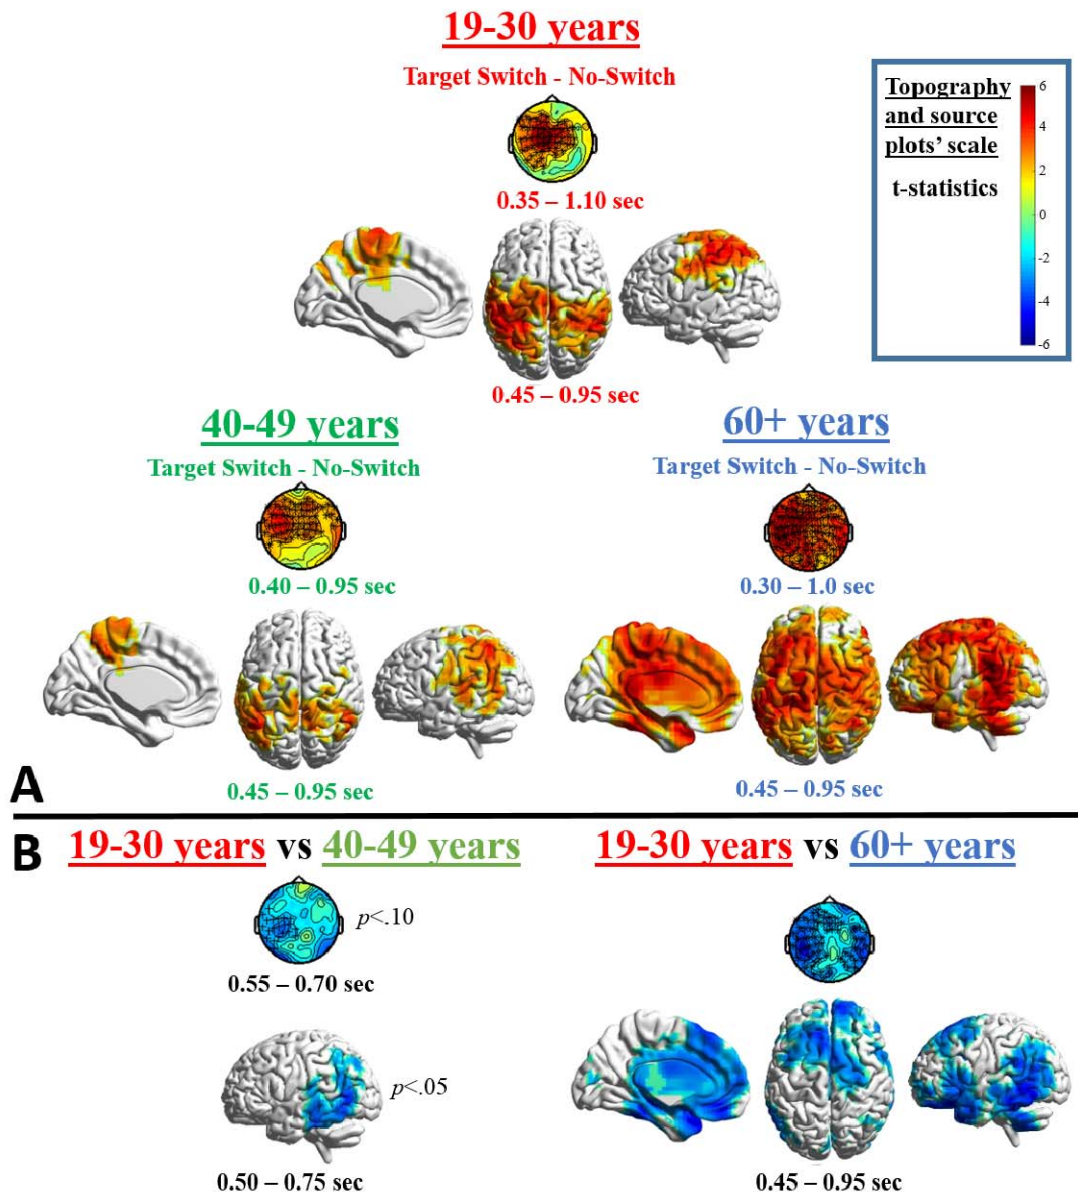

859

860 Figure 6. Effects in alpha (10-14Hz) when contrasting Target Switch and No-Switch condi-  
861 tions in each age group (panel A) and when exploring the Target Switch condition  $\times$  age in-  
862 teraction (panel B). Topographical (sensor level clusters) and source plots present  $t$ -statistics  
863 of significant clusters ( $p < .05$  in sensor plots, indicated by asterisks and  $p < .025$  in source  
864 plots, or as indicated in the respective sub-plot).

865

866 All age groups show significantly higher alpha power in the Target Switch condition in com-  
867 parison to the No-Switch condition which localised primarily to parietal regions in all age  
868 groups but was widely distributed across the cortex in the 60+ years group. The TFRs in Fig-  
869 ure 3 suggest that in the 19-30 and 40-49 years groups, this difference in alpha resulted from  
870 an alpha increase throughout the RSVP stream that was higher in the Target Switch condition  
871 than the No-Switch condition, whereas in the 60+ years group higher alpha in the Target  
872 Switch condition resulted from a greater alpha decrease in the No-Switch condition than the  
873 Target Switch condition throughout RSVP presentation. In contrast to the 19-30 years group,  
874 both the 40-49 and 60+ years groups displayed higher temporal lobe alpha in the Target  
875 Switch condition in comparison to the No-Switch condition.

876

877 Group comparisons of differences highlighted that the higher alpha in the Target Switch con-  
878 dition in comparison to the No-Switch condition was significantly greater in both the 40-49  
879 and 60+ years groups in comparison to the 19-30 years group, as is reflected by the negative  
880 clusters in Figure 6B. These negative clusters were confined to temporal and parietal areas in  
881 the 40-49 years group and were only marginally significant at the sensor level, while the 60+  
882 years group revealed more widely distributed clusters compared to the 19-30 years group,  
883 encompassing frontal, parietal, and temporal areas.

884

#### 885 No-Target Switch vs No-Switch

886 Statistical results comparing alpha power in No-Target Switch and No-Switch conditions in  
887 sensor and source space are presented in Figure 7A, and analysis of the interaction between  
888 RSVP condition and age group is displayed in Figure 7B.



## Alpha (10-14Hz): No-Target Switch vs. No-Switch

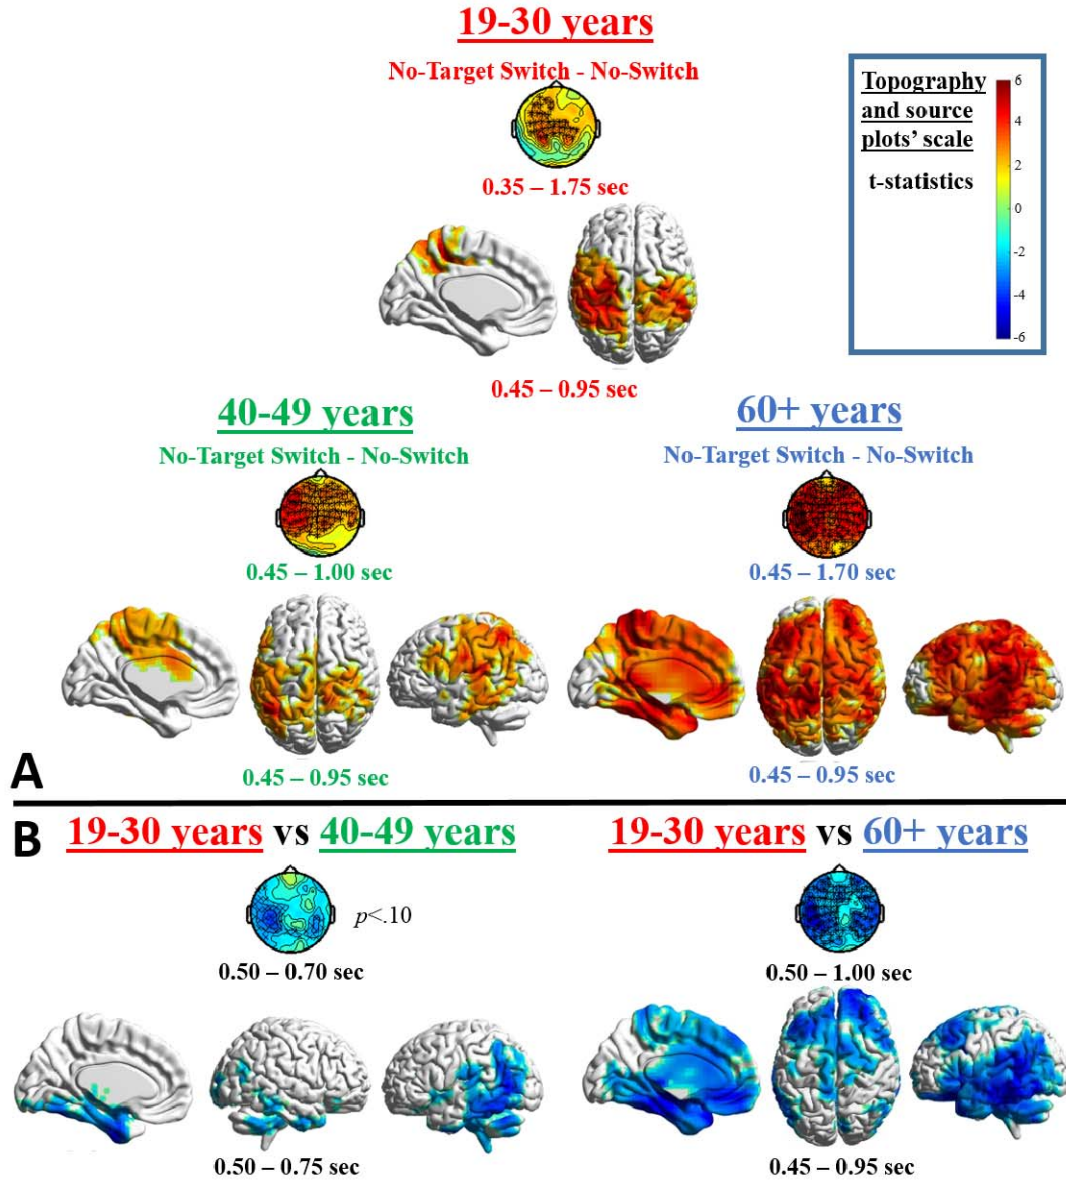

889

890 Figure 7. Effects in alpha (10-14Hz) when contrasting No-Target Switch and No-Switch conditions in each age group (panel A) and when exploring the No-Target Switch condition  $\times$   
 891 age interaction (panel B). Topographical (sensor level clusters) and source plots present  $t$ -  
 892 statistics of significant clusters ( $p < .05$  in sensor plots, indicated by asterisks and  $p < .025$  in  
 893 source plots, or as indicated in the respective sub-plot).  
 894  
 895

896 Similar to the Target Switch vs. No-Switch contrast, all age groups show significantly higher  
 897 alpha in the No-Target Switch condition in comparison to the No-Switch condition which  
 898 localised to parietal regions in all age groups but was more widely distributed across the cor-  
 899 tex in the 60+ years group. Similar to the pattern seen when comparing Target Switch and  
 900 No-Switch conditions in Figure 6, lower alpha in the No-Switch condition in comparison to

901 the No-Target Switch condition appears to have resulted from a greater alpha increase in the  
902 Target Switch condition in the 19-30 and 40-49 years groups and a greater alpha decrease in  
903 No-Switch condition in the 60+ years group (see also Figure 3).

904

905 Group comparisons revealed that the higher alpha in the No-Target Switch condition in com-  
906 parison to the No-Switch condition was significantly higher in both the 40-49 and 60+ years  
907 groups in comparison to the 19-30 years group, as is reflected by the negative clusters in Fig-  
908 ure 7B. While alpha effects were contained to parietal regions in the 19-30 years group, in the  
909 40-49 and especially in the 60+ years groups the higher alpha effects were both stronger and  
910 more widely distributed across the cortex. In the 40-49 years group the distribution extended  
911 primarily into the ventral processing stream in occipito-temporal cortex, whereas in the 60+  
912 years group the wider distribution also comprised frontal and prefrontal areas.

913

### 914 **3.2.3. Correlations between (theta and alpha) power and Switch-Costs**

915 In this section we explore the potential relationships across age groups between theta and al-  
916 pha power differences (between Switch and No-Switch conditions) on the one hand and be-  
917 havioural Switch-Costs in RTs on the other. This could help us to understand whether some  
918 of the power differences we observed within and between age groups might reflect compen-  
919 satory strategies (power modulations in the older groups might be related to decreasing  
920 Switch-Costs) or rather increased neural noise (power modulations in the older groups might  
921 be unrelated to behaviour or might even contribute towards increasing Switch-Costs) or defi-  
922 cient neural processing (deficiencies in power modulation in the older groups might contrib-  
923 ute towards increasing Switch-Costs). We were therefore primarily interested in understand-  
924 ing how power effects in the two older groups would relate to Switch-Costs in RTs and pur-  
925 sued the following two-step logic. Firstly, for each older age group we related RT-Switch-  
926 Costs to source power effects at specific coordinates found in the analyses within the respec-  
927 tive age group. Secondly, we related RT-Switch-Costs in each older group to source power  
928 effects in that group but taken from coordinates identified in the youngest group. For the lat-  
929 ter we reasoned that residual activation in older participants in sources identified to be in-  
930 volved in efficient processing in the young participants might still be beneficial for process-  
931 ing in the older participants. This would corroborate the notion that processing deviations of  
932 the ageing brain from the “young” brain are indeed related to decreased processing effi-  
933 ciency. Specifically, we expected that residual power in older groups at coordinates reflecting  
934 “young” processing could contribute towards reduced behavioural Switch-Costs.

935

936 To analyse the relationship between theta and alpha power modulation and RT-Switch-Costs,  
937 for each participant differences in power between each of the Switch conditions and the No-  
938 Switch condition were extracted at several MNI coordinates and entered into Spearman's cor-  
939 relation analyses with Target and No-Target RT-Switch-Costs. RT-Switch-Costs were corre-  
940 lated with power differences between Target Switch and No-Switch and between No-Target  
941 Switch and No-Switch conditions, respectively, for each of the two older age groups (40-49,  
942 60+ years) and each of the frequency bands (theta, alpha) separately. MNI coordinates for  
943 each age- and frequency-specific correlation were selected based on the peak *t*-values of sig-  
944 nificant clusters that compared Switch and No-Switch conditions in the respective age group  
945 as well as in the youngest group. Selected MNI coordinates (and corresponding atlas labels)  
946 are provided in the SM, in Tables SM1 - SM4. Correlation analyses were exploratory and  
947 were not corrected for multiple comparisons.

### Theta (3-5Hz) power change correlations with Target Switch-Costs: 60+ years group

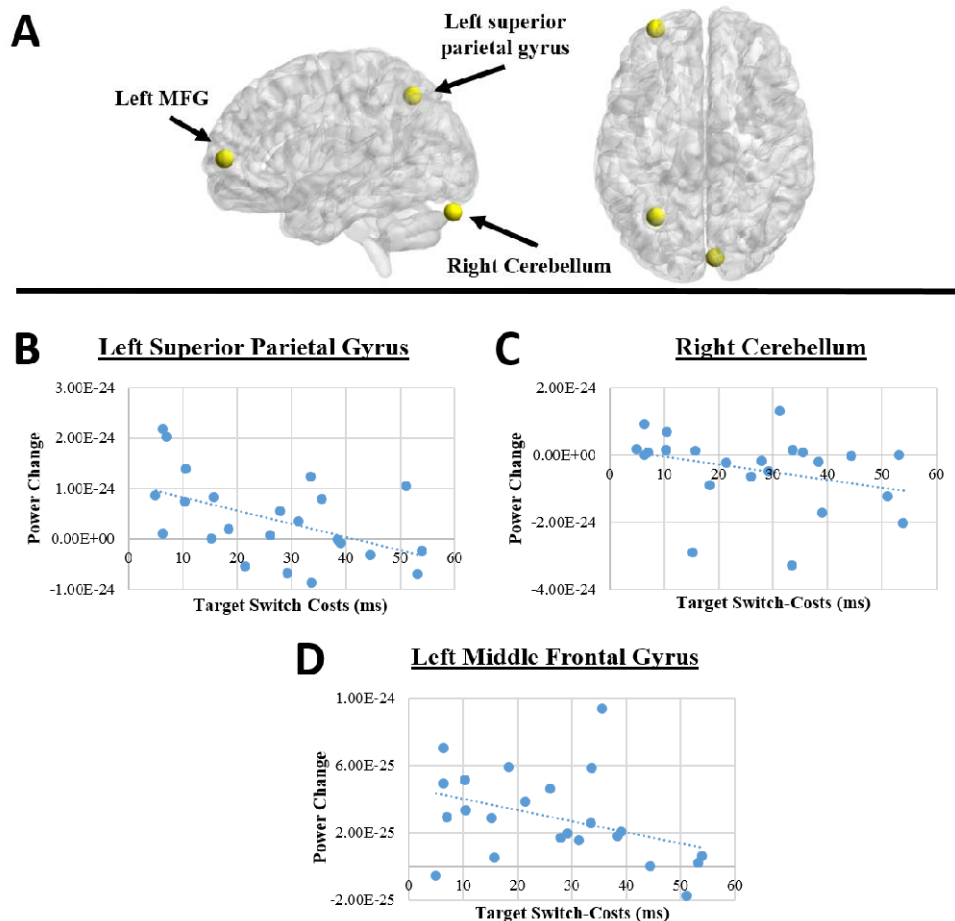

948

949 Figure 8. MNI coordinates of significant correlations between theta (3-5Hz) power change  
950 and Target Switch-Costs in the 60+ years group (panel A), and scatter-plots illustrating these  
951 correlations in the left superior parietal gyrus (panel B), right cerebellum (panel C) and left  
952 middle frontal gyrus (panel D).

953

954 Scatter-plots and source plots illustrating significant correlations are presented in Figure 8. In  
955 comparison to the younger adults, the two older groups had displayed greater theta power in-  
956 creases in frontal regions but weaker theta power increases in parietal regions for Target RT-  
957 Switch-Costs (Figure 4). Accordingly, in the 60+ years group, greater theta power increases  
958 in the left superior parietal gyrus ( $r=-.53$ ,  $p=.010$ ) and left MFG ( $r=-.40$ ,  $p=.057$ ) were asso-  
959 ciated with decreased Target RT-Switch-Costs. The left MFG coordinates were based on the  
960 theta power effect observed for the 60+ years group (Figure 4A) that indicated stronger fron-  
961 tal theta in this group. Importantly, due to deficient parietal theta in the 60+ years group over-  
962 all (Figure 4B), the coordinates for the parietal correlation effect were adopted from the 19-  
963 30 years group, in order to specifically investigate whether residual theta power in the oldest  
964 participants would be beneficial for attention switching. This indeed seems to be the case and  
965 the overall pattern supports the notion that the additional frontal recruitment in the oldest  
966 group reflects compensation rather than increased neural noise and it further suggests that  
967 deficits in parietal theta could be related to impaired switching. However, no effects were ob-  
968 served for the 40-49 years group that could corroborate this conclusion.

969

970 The two older groups also displayed posterior negative theta power clusters that localised to  
971 occipital regions and the cerebellum. A negative correlation between Target RT-Switch-Costs  
972 and theta power modulation in the right cerebellum region ( $r=-.44$ ,  $p=.035$ ) in the 60+ years  
973 group may therefore reflect increased RT-Switch-Costs with increased posterior theta defi-  
974 ciencies, in concordance with previous findings (e.g. PASA hypothesis Davis et al. 2008; see  
975 Introduction for details). Note that in the Target Switch comparison (with No-Switch) the  
976 posterior negative cluster seen in sensor analysis failed to reach significance in the 60+ years  
977 group (Figure 4A). To reiterate, this is likely due to the limited sensitivity of cluster permuta-  
978 tion analyses in localising both positive and negative clusters in source space. As a deteriora-  
979 tion in task-related posterior activity was related to out hypothesis, we wanted to explore  
980 whether such changes were related to behavioural performance. Power change in this poste-  
981 rior negative cluster was therefore taken from coordinates based on the 40-49 years group's  
982 cluster peak. There were no further significant correlations between Target RT-Switch-Costs  
983 and theta power change in any age group ( $p>.05$ ) and there were also no significant correla-

984 tions between No-Target RT-Switch-Costs and theta power changes in any age group  
985 ( $p>.10$ ).

986

987 Although the two older age groups displayed significantly stronger alpha modulations in  
988 comparison to the younger adults (Figures 6B, 7B), these modulations do not appear to have  
989 a clear relationship with Switch-Costs in RTs, since none of the calculated correlations  
990 reached significance ( $p>.10$ ). The absence of a correlation between RT-Switch-Costs and al-  
991 pha power modulation in the oldest group is consistent with Vaden et al.'s (2012) proposition  
992 that alpha becomes redundant with increased age. However, the stronger alpha modulation in  
993 the two older groups across conditions implies that alpha oscillations are still task-related in  
994 older age, despite the seemingly weak benefits on performance. This was further strengthened  
995 by a lack of correlation between MFG theta (that had been related to reduced Switch-Costs)  
996 and posterior alpha. Rather than compensation it could therefore be that this strong modula-  
997 tion of alpha power reflects increased neural noise (Shih, 2009). This suggestion, however,  
998 will require specific further testing as it is based on the interpretation of a null result.

999

#### 1000 **3.2.4. Network connectivity (NBS) analysis**

1001 Having observed age-related changes in both theta and alpha power, age-related changes in  
1002 functional connectivity were explored. This analysis was based on the assumption that task-  
1003 related frequency-specific connectivity requires a certain amount of neural precision to en-  
1004 able two brain regions to synchronise their neural activity in a manner beneficial to the task at  
1005 hand. Therefore, if more extensive neural activation (power) is due to increased neural noise,  
1006 functional connectivity should be weaker with increased age. On the other hand, if more ex-  
1007 tensive neural activation is due to compensatory recruitment then it may be that functional  
1008 connectivity is greater with increased age, as the extent of precise communication across the  
1009 cortex increases.

1010

1011 Functional connectivity between 116 AAL atlas regions was estimated with wPLI (see Meth-  
1012 ods Section 2). To investigate whether there were any changes in functional connectivity be-  
1013 tween Switch and No-Switch conditions and between age groups, non-parametric NBS was  
1014 applied (Zalesky et al., 2010). NBS analysis of the main effects of RSVP condition for each  
1015 age group are reported in the SM (Figures SM2 - SM5), as it was primarily the interactions  
1016 between age group and RSVP condition that were most relevant to our hypotheses. Specifi-  
1017 cally, interactions were examined to establish whether older age groups presented with more

1018 extensive task-related connectivity, to compensate for difficulties in switching between atten-  
1019 tional modalities, or weaker task-related connectivity, which would reflect that synchronisa-  
1020 tion between cortical regions is reduced with age.

1021

1022 To identify interactions between RSVP condition and age, age groups (19-30 vs 40-49 years;  
1023 19-30 vs 60+ years) were compared on the differences between Switch and No-Switch condi-  
1024 tions, consistent with the analysis implemented for sensor and source power in Section 3.2.1  
1025 and 3.2.2. A description of how this was implemented can be found in the Data analysis sec-  
1026 tion (Section 2.3).

1027

1028 Significant networks are presented in Figures 9 - 12. To further characterise networks that  
1029 were found to be significantly different between age groups, nodes were categorised into  
1030 eight anatomical regions (frontal, occipital, parietal, temporal and hippocampal, cerebellum,  
1031 insula, striatum, thalamus), consistent with Verdejo-Román et al. (2017) and Ye et al. (2014).  
1032 The matrix plots in Figures 9 - 12 illustrate the number of connections between each of the  
1033 eight regions within each network. The total number of connections incorporated in each  
1034 network is determined by the arbitrary  $t$ -threshold selected in the NBS analysis and each net-  
1035 work has a different total number of nodes and edges (Tewarie et al., 2014; Tewarie et al.,  
1036 2015). The scales of each matrix plot are therefore different across networks and differences  
1037 should be interpreted with caution. A more detailed discussion of NBS can be found in Sec-  
1038 tion 2.3.2.

1039

#### 1040 *Theta network connectivity*

1041 NBS results (theta network connectivity) investigating the RSVP condition Target  
1042 Switch/No-Switch  $\times$  age interaction are presented in Figure 9, and investigating the RSVP  
1043 condition No-Target Switch/No-Switch  $\times$  age interaction are presented in Figure 10.

## Theta (3-5Hz) connectivity: Target Switch vs. No-Switch

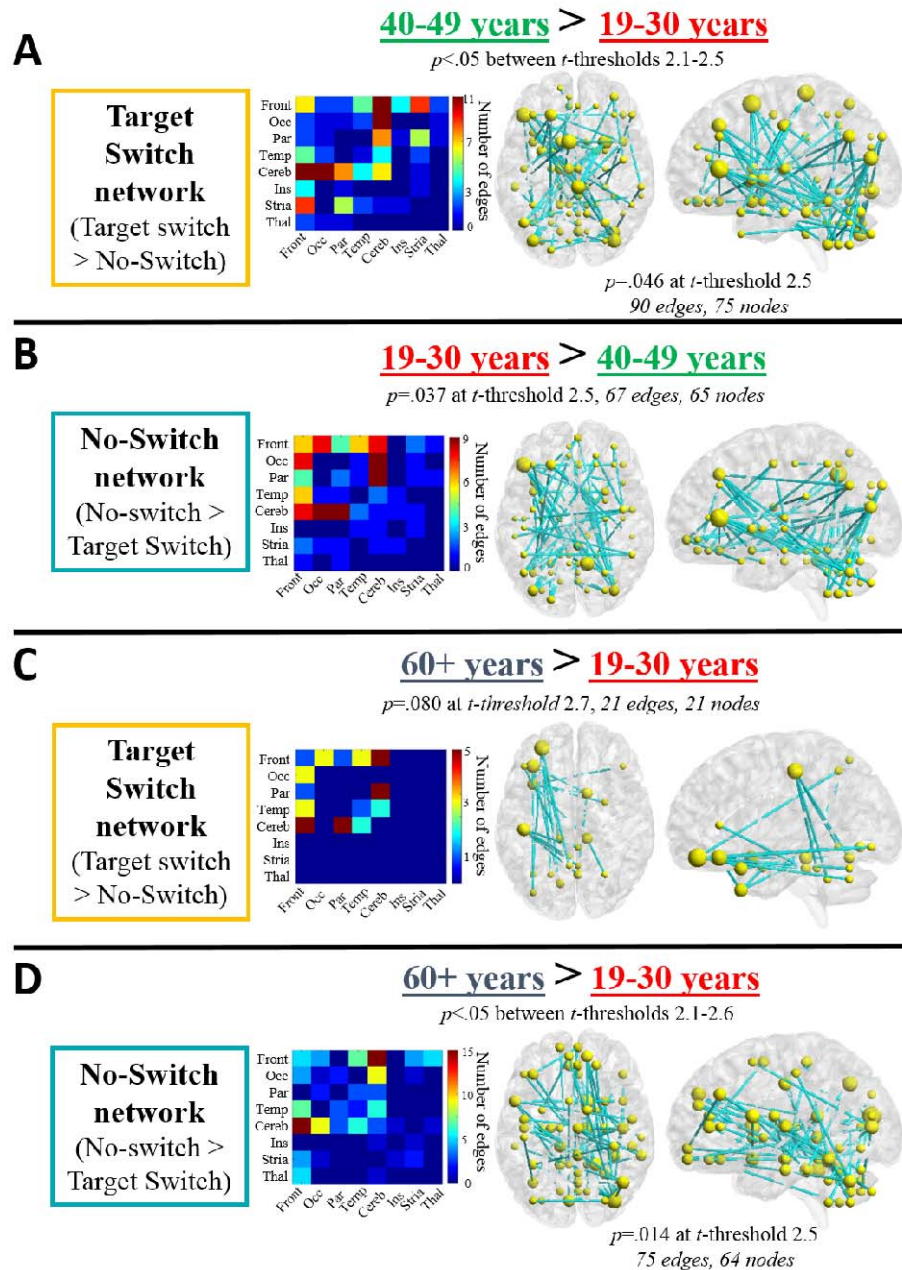

1044

1045 Figure 9. NBS results exploring the interaction between Target Switch condition and age  
 1046 group in theta (3-5Hz) connectivity (wPLI) between 0.55-1.55s. Group comparisons of Tar-  
 1047 get Switch (Target Switch > No-Switch) networks (panels A and C) and No-Switch (No-  
 1048 Switch > Target Switch) networks (panels B and D). Significant networks are plotted in  
 1049 BrainNet on surface plots. Node sizes represent node degree, where larger nodes have a  
 1050 higher degree. Matrix plots illustrate the number of connections between eight categories of  
 1051 neural regions, including frontal (Front), occipital (Occ), parietal (Par), temporal (Temp),  
 1052 cerebellar (Cereb), insula (Ins), striatum (Stria) and thalamus (Thal). Note that the number of  
 1053 connections in each network vary and so the scales of matrix plots differ.

### Theta (3-5Hz) connectivity: No-Target Switch vs. No-Switch

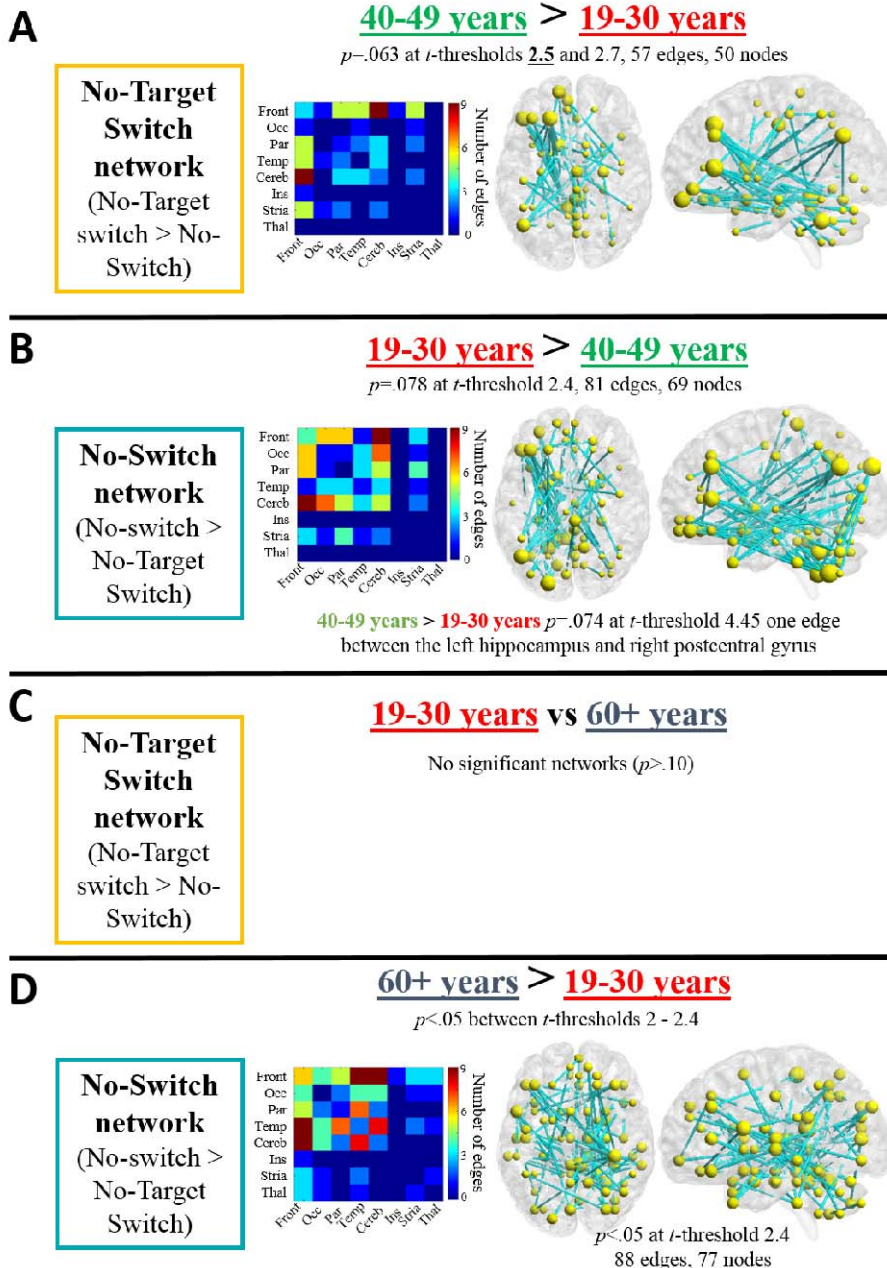

1054  
 1055  
 1056  
 1057  
 1058  
 1059  
 1060  
 1061  
 1062  
 1063  
 1064

Figure 10. NBS results exploring the interaction between No-Target Switch condition and age group in theta (3-5Hz) connectivity (wPLI) between 0.55-1.55s. Group comparisons of Target Switch (No-Target Switch > No-Switch) networks (panels A and C) and No-Switch (No-Switch > No-Target Switch) networks (panels B and D). Significant networks are plotted in BrainNet on surface plots. Node sizes represent node degree, where larger nodes have a higher degree. Matrix plots illustrate the number of connections between eight categories of neural regions, including frontal (Front), occipital (Occ), parietal (Par), temporal (Temp), cerebellar (Cereb), insula (Ins), striatum (Stria) and thalamus (Thal). Note that the number of connections in each network vary.



1065 The 40-49 years group showed more widely distributed theta networks than the 19-30 years  
1066 group when there were increased attentional demands in the two Switch conditions, as can be  
1067 seen in Figures 9A and 10A, particularly between frontal nodes and temporal and parietal re-  
1068 gions and between the cerebellum and frontal, parietal and temporal regions. These findings  
1069 are consistent with the additional theta power activity that we identified in frontal regions  
1070 with source analysis in Section 3.2.1. Again, it could be that more extensive connectivity is  
1071 reflecting compensatory recruitment, as participants utilise additional resources to cope with  
1072 increased attentional demands. In the No-Switch networks, however, the 40-49 years group  
1073 showed weaker connectivity in comparison to the 19-30 years group (Figures 9B and 10B). It  
1074 should be noted that there was no significant difference in RT overall between the 19-30 and  
1075 40-49 years groups. It could be that this weaker connectivity in the network related to the eas-  
1076 ier task condition (No-Switch) is reflecting an initial decline in attentional networks in the 40-  
1077 49 years group that is not yet seen in behaviour, and therefore not yet compensated for with  
1078 an increase in top-down attentional control.

1079

1080 The 60+ years group displayed more widely distributed theta networks (including Target  
1081 Switch > No-Switch, No-Switch > Target Switch, and No-Switch > No-Target Switch net-  
1082 works) than the 19-30 years group, particularly in frontal, parietal and temporal regions and  
1083 the cerebellum. These findings are consistent with the additional recruitment of temporal and  
1084 frontal regions that was seen in theta source statistics, and could reflect older participants re-  
1085 lying more on top-down attentional control from the frontal lobe to cope with task demands,  
1086 (Badre and Wagner, 2004; Baluch and Itti, 2011; Bouvier, 2009; Kastner and Ungerleider,  
1087 2000; Kerns et al., 2004), e.g. by supporting parietal regions that we found to be theta-  
1088 deficient (see Figure 4B). Increased synchronisation between cortical regions supports com-  
1089 pensatory models of ageing (Davis et al., 2008; Madden, 2007), rather than more widely dis-  
1090 tributed activity being a result of increased neural noise (Shih, 2009; Welford, 1981). If activ-  
1091 ity seen in additional regions was merely due to increased noise in the network, one would  
1092 expect weaker connectivity between nodes in the 60+ years group in comparison to the 19-30  
1093 years group, as variability in the firing rate of neuronal populations would prevent more pre-  
1094 cise synchronisation of distributed cortical regions. On the contrary, we found stronger syn-  
1095 chronisation in the older group. Interestingly, the No-Switch networks that were greater in the  
1096 60+ years group compared to the youngest group (Figures 9D, 10D) were more pronounced  
1097 and widely distributed than Switch networks (Figures 9C, 10C, the latter revealing no signifi-  
1098 cant age group differences). This pattern could be taken to suggest that brain networks in

1099 older participants might already require compensatory recruitment to perform well under easy  
1100 conditions, and in turn have limited additional resources to recruit under truly challenging  
1101 conditions. This contrasts with the 40-49 years group who displayed more extensive connec-  
1102 tivity than the youngest group (implying compensatory recruitment) when there were higher  
1103 cognitive demands in the Switch conditions, not not in the No-Switch conditions (Figures 9A,  
1104 9B, 10A and 10B).

1105

#### 1106 *Alpha network connectivity*

1107 Figures 11 and 12 present alpha network connectivity NBS results, which investigate the  
1108 RSVP condition  $\times$  age interaction for the Target Switch condition (Figure 11) and No-Target  
1109 Switch condition (Figure 12).

1110

1111

## Alpha (10-14Hz) connectivity: Target Switch vs. No-Switch

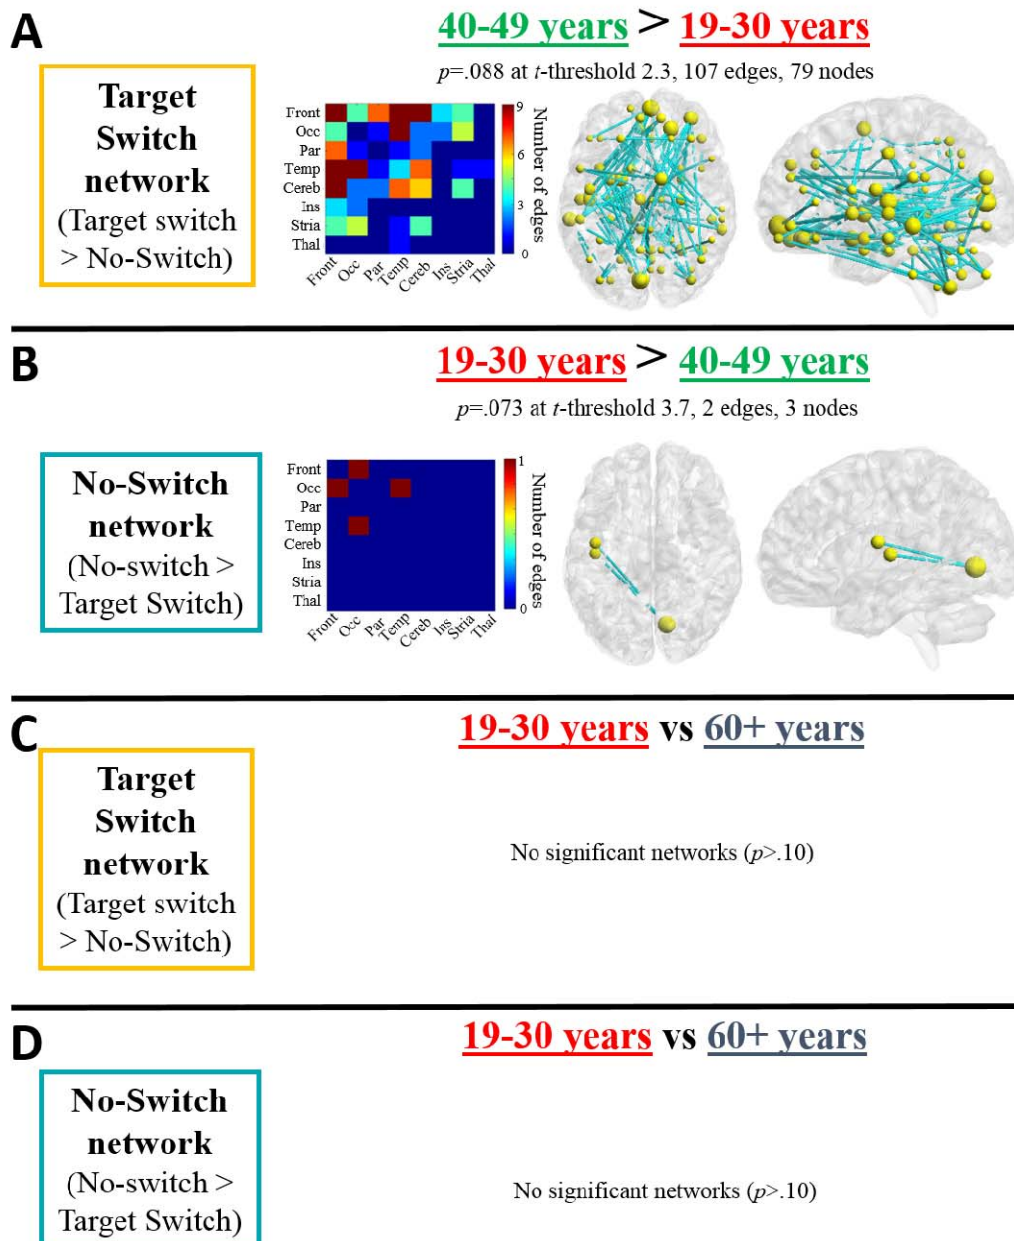

1112

1113 Figure 11. NBS results exploring the interaction between Target Switch condition and age  
1114 group in alpha (10-14Hz) connectivity (wPLI) between 0.45-0.95s. Group comparisons of  
1115 Target Switch (Target Switch > No-Switch) networks (panels A and C) and No-Switch (No-  
1116 Switch > Target Switch) networks (panels B and D). Significant networks are plotted in  
1117 BrainNet on surface plots. Node sizes represent node degree, where larger nodes have a  
1118 higher degree. Matrix plots illustrate the number of connections between eight categories of  
1119 neural regions, including frontal (Front), occipital (Occ), parietal (Par), temporal (Temp),  
1120 cerebellar (Cereb), insula (Ins), striatum (Stria) and thalamus (Thal). Note that the number of  
1121 connections in each network vary and so the scales of matrix plots differ.

## Alpha (10-14Hz) connectivity: No-Target Switch vs. No-Switch

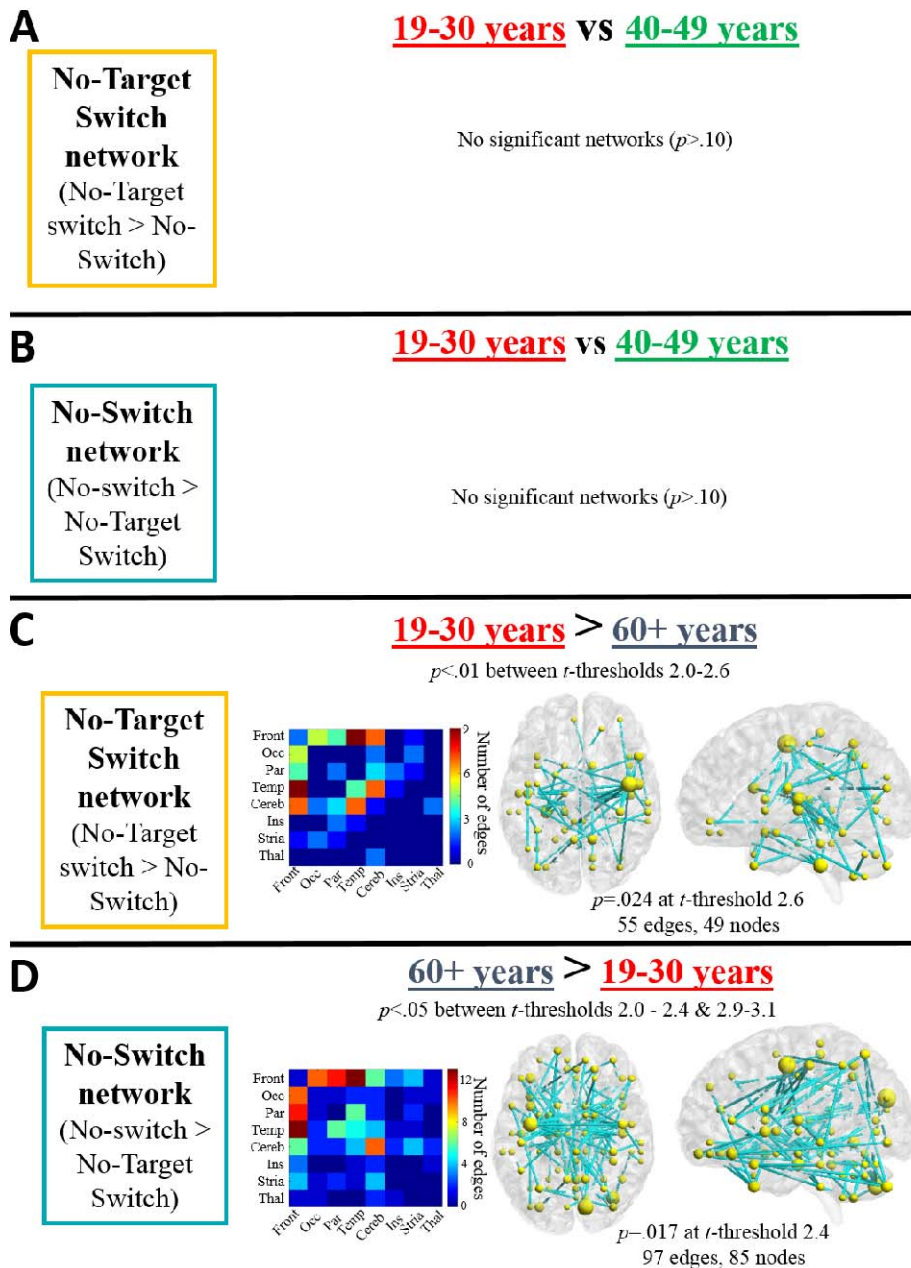

1122

1123 Figure 12. NBS results exploring the interaction between Target Switch condition and age  
 1124 group in alpha (10-14Hz) connectivity (wPLI) between 0.45-0.95s. Group comparisons of  
 1125 No-Target Switch (No-Target Switch > No-Switch) networks (panels A and C) and No-  
 1126 Switch (No-Switch > No-Target Switch) networks (panels B and D). Significant networks are  
 1127 plotted in BrainNet on surface plots. Node sizes represent node degree, where larger nodes  
 1128 have a higher degree. Matrix plots illustrate the number of connections between eight catego-  
 1129 ries of neural regions, including frontal (Front), occipital (Occ), parietal (Par), temporal  
 1130 (Temp), cerebellar (Cereb), insula (Ins), striatum (Stria) and thalamus (Thal). Note that the  
 1131 number of connections in each network vary and so the scales of matrix plots differ.  
 1132

1133 Similar to the pattern of connectivity in theta band, the 40-49 years group showed weaker  
1134 connectivity in comparison to the 19-30 years group in the No-Switch network (No-Switch >  
1135 Target Switch; Figure 11B), but a more widely distributed network than the 19-30 years  
1136 group when there was increased attentional demands in the Target Switch network (Figure  
1137 11A). Increased connectivity was particularly seen between frontal nodes and temporal re-  
1138 gions and the cerebellum and between temporal and occipital nodes. Again it could be that  
1139 this is reflecting compensatory recruitment specifically under higher demands on processing.  
1140 There were no significant differences between the 19-30 and 40-49 years groups when con-  
1141 trasting No-Target Switch and No-Switch networks ( $p>.10$ ).

1142

1143 There were no significant differences between the 19-30 and 60+ years groups when contrast-  
1144 ing Target Switch and No-Switch networks ( $p>.10$ ). However, the 19-30 years group dis-  
1145 played significantly greater No-Target Switch connectivity in comparison to the 60+ years  
1146 group, particularly to frontal nodes and temporal nodes and to the cerebellum. Together these  
1147 findings suggest that the observed increases in alpha power modulation (Figure 6) may reflect  
1148 increased neural noise (Shih, 2009; Welford, 1981) and dedifferentiation (Cabeza, 2002)  
1149 rather than compensatory recruitment (Davis et al., 2008; Fabiani et al., 2006; Madden,  
1150 2007). On the other hand, the 60+ years group displayed greater No-Switch connectivity (No-  
1151 Switch > No-Target Switch) in comparison to the 19-30 years group, between frontal nodes  
1152 and occipital, parietal and temporal nodes, which demonstrates a certain level of functionality  
1153 in increased alpha power modulation, rather than neural noise alone. Again it could be that  
1154 brain networks in older participants already require compensatory recruitment to perform  
1155 well under easy conditions, and have fewer additional resources available to recruit under  
1156 harder conditions. It therefore seems that more extensive alpha power modulation in the old-  
1157 est age group (Figures 6B and 7B) is not reflected in increased functional connectivity.

1158

### 1159 **3.2.5. Minimum Spanning Tree (MST) analysis**

1160 To explore age group differences in the topology of Switch and No-Switch networks, MSTs  
1161 were formed from alpha and theta wPLI matrices for each RSVP condition for each age  
1162 group. MSTs comprised of 116 nodes corresponding to the 116 AAL atlas regions. Local  
1163 MST metrics, degree, betweenness centrality and eccentricity were computed for each node  
1164 in each MST. Results can be found in Figure SM8-SM11 in the SM.

1165

1166 Global MST metrics leaf fraction and mean eccentricity were computed separately for theta  
1167 and alpha MSTs and submitted to two 3×3 (age group × RSVP condition) ANOVAs, respec-  
1168 tively. There were no significant effects of age or RSVP condition, and no interactions be-  
1169 tween age and RSVP condition on either mean eccentricity or leaf fraction ( $p>.10$ ) for the  
1170 theta MSTs, which indicates that the global topology of a theta driven network is similar  
1171 across age groups and RSVP conditions. Group means of mean eccentricity and leaf fraction  
1172 in theta MSTs are presented in Figure SM7 in the SM. In contrast, alpha MSTs revealed sig-  
1173 nificant effects described below (see Figure 13).  
1174

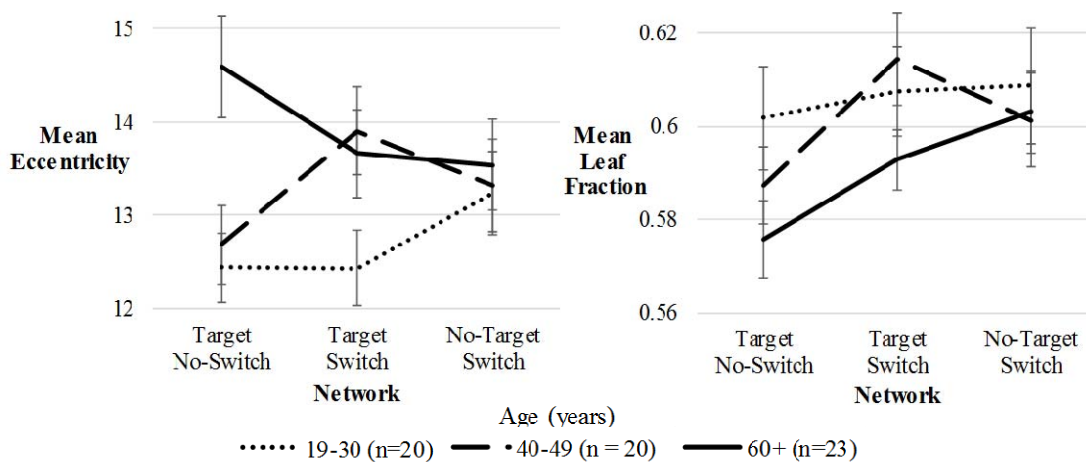

1175

1176 Figure 13. Group means of global alpha MST metrics mean eccentricity (left) and leaf frac-  
1177 tion (right) for networks in each RSVP condition. Vertical bars represent the SE.

1178

#### 1179 Mean eccentricity (alpha MST)

1180 The RSVP condition × age group ANOVA on mean eccentricity in alpha MSTs revealed no  
1181 significant main effect of RSVP condition ( $p>.10$ ), however revealed a significant main effect  
1182 of age ( $F(2,60)=3.77$ ,  $p=.029$ ,  $\eta^2_p=.11$ ) and a significant interaction between age and RSVP  
1183 condition ( $F(4,120)=2.73$ ,  $p=.032$ ,  $\eta^2_p=.08$ ).

1184

1185 Post-hoc comparisons revealed that the 19-30 years group had significantly lower eccentricity  
1186 in comparison to the 60+ years group ( $p=.024$ ). There were no other significant age group  
1187 differences in mean eccentricity. Shorter overall path lengths in the 19-30 years group in  
1188 comparison to the 60+ years group indicates stronger connectivity on a local level rather than  
1189 a longer range network (Tewarie et al., 2015), which corroborates the notion of recruitment  
1190 of longer range networks in the oldest group for attempting compensatory strategies.

1191

1192 To further explore the interaction between age and RSVP condition, independent t-tests were  
1193 carried out to compare groups on mean eccentricity in each of the RSVP conditions sepa-  
1194 rately. Independent t-tests revealed that the overall pattern of eccentricity mirrors age group  
1195 differences in RTs and Switch-Costs (see Figure 2). The 19-30 and 40-49 years groups did  
1196 not significantly differ in the No-Switch condition in mean eccentricity ( $p>.10$ ) and overall  
1197 did not differ in RT, whereas the older group showed both significantly slower RTs ( $p<.001$ )  
1198 and higher eccentricity than both the 19-30 ( $t(41)=-3.18, p=.003$ ) and 40-49 ( $t(41)=-2.75,$   
1199  $p=.009$ ) years groups. In the Target Switch condition both the 40-49 ( $t(38)=-2.39, p=.022$ )  
1200 and 60+ years ( $t(41)=-1.94, p=.059$ ) groups show higher eccentricity in comparison to the 19-  
1201 30 years group, as well as higher RT-Switch-Costs (see Section 3.1). In the No-Target Switch  
1202 condition the 40-49 years and 60+ years groups show no significant differences in RT-  
1203 Switch-Costs in comparison to the 19-30 years group, and show no significant difference in  
1204 mean eccentricity ( $p>.10$ ). Despite alpha MST eccentricity mirroring mean RTs across age  
1205 groups and RSVP conditions, there were no significant correlations between participants'  
1206 mean eccentricity and Switch-Costs for any age group ( $p>.10$ ).

1207

#### 1208 Leaf fraction (alpha MST)

1209 As shown in Figure 13 (right), the RSVP condition  $\times$  age group ANOVA on leaf fraction re-  
1210 vealed a significant main effect of RSVP condition ( $F(2,120)=3.97, p=.021, \eta^2_p=.06$ ). There  
1211 was no significant main effect of age, and no significant interaction between age and RSVP  
1212 condition on leaf fraction ( $p>.10$ ). Post hoc comparisons revealed that leaf fraction was lower  
1213 in the No-Switch condition in comparison to both the Target Switch ( $p=.023$ ) and No-Target  
1214 Switch ( $p=.075$ ) conditions, although the latter failed to reach significance. Higher leaf frac-  
1215 tion in the two Switch conditions implies that networks are characterised by efficient connec-  
1216 tivity directly between nodes, indicating local connectivity, rather than a network character-  
1217 ised by chain-like, long range connectivity (Tewarie et al., 2014; Tewarie et al., 2015).

1218

1219 There were no significant correlations between participants' leaf fraction and Switch-Costs  
1220 for the 19-30 or 60+ years group ( $p>.05$ ). There was a significant positive correlation be-  
1221 tween No-Target Switch-Costs and leaf fraction in the No-Switch condition in the 40-49  
1222 years group ( $r=.55, p=.012$ ). As the No-Switch MST presented more characteristics indicat-  
1223 ing local network connectivity, Switch-Costs increased.

1224

1225 **4. Discussion**

1226 In our previous work we demonstrated that older adults find refocusing attention from time to  
1227 space more difficult than younger adults (Callaghan et al., 2017). In the current study we rep-  
1228 licated these results and found that the 40-49 and 60+ years groups had increased Switch-  
1229 Costs compared to the 19-30 years group as reflected by disproportionately increased RTs  
1230 when required to refocus attention from a temporal RSVP task to a spatial VS task. The pri-  
1231 mary aim of the current study was to investigate the age-related changes in neural mecha-  
1232 nisms that may underlie this difficulty in refocusing attention from events changing in time to  
1233 stimuli distributed spatially.

1234

1235 Also consistent with Callaghan et al. (2017), RTs of the 60+ years group were overall slower  
1236 in comparison to the 19-30 years group. On the other hand, RTs of the 40-49 and 19-30 years  
1237 groups did not significantly differ, implying that the 40-49 years group found the baseline  
1238 No-Switch condition no more demanding than younger adults. However, the 40-49 years  
1239 group again presented significantly higher Switch-Costs than the 19-30 years group, suggest-  
1240 ing that they found the Target Switch condition disproportionality more demanding than the  
1241 No-Switch condition, contrasting with the 19-30 years group. The 40-49 years group there-  
1242 fore seem to present an intermediate stage of ageing, where some aspects of attentional con-  
1243 trol are affected very little by age and participants function at a similar level to younger  
1244 adults, whereas other aspects of attentional control are already affected by age and RTs and  
1245 neural mechanisms coincide more with patterns observed in older adults. This general pattern  
1246 was mirrored in both NBS and MST functional connectivity data in both theta and alpha fre-  
1247 quencies and is discussed in further detail below, as well as in the SM in regards to local  
1248 MST metric eccentricity.

1249

1250 Conforming to our hypotheses based on previous reports (Cummins and Finnigan, 2007;  
1251 Deiber et al., 2013; Gazzaley et al., 2008; Vaden et al., 2012; van de Vijver et al., 2014), we  
1252 indeed observed modulations of theta and alpha oscillatory power at sensor level as well as in  
1253 source space (Figures 3-7). The hypothesis that there would be reduced theta power with in-  
1254 creased age was partially supported. The enhanced spatial resolution of MEG compared to  
1255 EEG warranted further analysis in source space, which revealed that reduced theta power lo-  
1256 calised to occipital and parietal regions. However, instead of a reduction in frontal midline  
1257 theta power, as indicated by several previous reports (Cummins and Finnigan, 2007; Reichert



1258 et al., 2016; van de Vijver et al., 2014), frontal midline theta was increased for the attention  
1259 Switch conditions in the two older age groups, particularly in the 40-49 years group in rela-  
1260 tion to a Target Switch. An increase in frontal midline theta with increased age is in line with  
1261 the findings of Gazzaley et al. (2008). The 60+ years group presented with a more widely dis-  
1262 tributed theta increase in frontal regions across both Switch conditions. Theta power findings  
1263 were therefore consistent with hypotheses of increased frontal theta activity reflecting addi-  
1264 tional compensatory processing (Davis et al., 2008; Fabiani et al., 2006; Madden, 2007), par-  
1265 ticularly supporting the PASA compensation hypothesis of ageing (Davis et al., 2008) that  
1266 proposes a posterior to anterior shift with increasing age.

1267

1268 As anticipated, there were age-related changes in task related alpha modulation, where the  
1269 oldest age group failed to show an alpha increase to inhibit irrelevant visual information  
1270 (Vaden et al., 2012) and instead showed a stronger and widely distributed alpha desynchroni-  
1271 zation (Figure 3, 6B and 7B). The middle-aged group presented a similar pattern to the older  
1272 group, with a weaker alpha increase in comparison to younger adults and a stronger and more  
1273 widely distributed alpha modulation across the cortex. Alpha MST metrics confirmed our hy-  
1274 pothesis that networks would display a more “star-like” structure in the younger adults, re-  
1275 flecting efficient local connectivity compared to the older adults who displayed more “chain-  
1276 like” topologies, reflecting less efficient, longer range connectivity. Thus, both theta and al-  
1277 pha signatures revealed widely distributed processing networks in older participants, with a  
1278 stronger propensity towards frontal involvement compared to the youngest group. However,  
1279 alpha modulations did not reveal significant correlations with behavioural Switch-Costs, pos-  
1280 sibly supporting an interpretation in terms of increased neural noise (Shih, 2009; Welford,  
1281 1981). In the following sections we will discuss various aspects of our results in more detail,  
1282 before reaching final conclusions.

1283

#### 1284 **4.1. Theta power and network connectivity**

1285 As shown in Figure 4B, the 40-49 and 60+ years groups appear to have a theta deficit in  
1286 comparison to the 19-30 years group. The 19-30 years group showed higher Target Switch  
1287 related theta in parietal regions in comparison to the two older age groups. Reduced parietal  
1288 activity in older compared to younger groups contrasts with Cabeza et al.’s (2004) findings of  
1289 increased posterior parietal activity. Posterior parietal activity is usually observed during en-  
1290 hanced attention (Coull and Nobre, 1998; Li et al., 2013; Madden et al., 2007; Shapiro et al.,  
1291 2002). However, increased parietal theta in the current task seems to be related to RSVP tar-

1292 get processing rather than refocusing attention, as no significant difference in theta was seen  
1293 between No-Target Switch and No-Switch conditions in the 19-30 years group (Figure 5A). It  
1294 appears that this parietal theta increase in younger adults reflects enhanced attention directed  
1295 towards the RSVP target and RSVP target processing (Imaruoka et al., 2003).

1296

1297 In addition to a deficit in parietal theta power related to target processing, both the 40-49 and  
1298 60+ years groups showed significantly lower occipital and cerebellar theta in both Switch  
1299 conditions (compared to the No-Switch condition), a difference that was not present in the  
1300 19-30 years group. It could be that posterior theta deficits in the two Switch conditions are  
1301 linked to age-related increases in VS RTs in these conditions, a notion that is supported by  
1302 the correlation between increased Switch-Costs and reduced cerebellar theta power in the 60+  
1303 years group. Furthermore, there was a trend towards decreased network node centrality  
1304 (measured as local MST measure betweenness centrality), in the right occipital gyrus in the  
1305 60+ years group in comparison to the 19-30 years group (see Figure SM9 for details). Re-  
1306 duced activity in the occipital lobe is consistent with previous findings of age-related reduc-  
1307 tions in visual cortex activity during visual processing and more generally with the PASA  
1308 hypothesis (Davis et al., 2008; Huettel et al., 2001; Madden et al., 2002; Ross et al., 1997).

1309

1310 Current findings were consistent with the compensatory recruitment of additional cortical re-  
1311 gions with increased age (Davis et al., 2008; Fabiani et al., 2006; Madden, 2007; Park and  
1312 Reuter-Lorenz, 2009; Reuter-Lorenz and Park, 2014). Despite the theta deficit in the occipital  
1313 lobe, the 60+ years group showed significantly higher frontal and temporal theta power in the  
1314 two Switch conditions in comparison to the No-Switch condition, and the 40-49 years group  
1315 showed higher frontal theta power in the Target Switch condition compared to the No-Switch  
1316 condition (Figures 4 and 5). Importantly, higher theta in the MFG and parietal cortex in the  
1317 Target-Switch condition (compared to No-Switch) correlated with reduced RT-Switch-Costs  
1318 in the 60+ years group, implying a compensatory role of the MFG (Cabeza et al., 2018; Park  
1319 and Reuter-Lorenz, 2009; Reuter-Lorenz and Park, 2014). The correlation between the parietal  
1320 theta effect and Switch-Costs in this group is of particular importance as the parietal  
1321 source coordinates were adopted from a theta effect in the youngest group. Thus, it appears  
1322 that stronger residual parietal theta activity in older individuals, which resembles parietal  
1323 theta activity in the young group, is beneficial to attentional switching in these older indi-  
1324 viduals and reflects the *maintenance* of attention mechanisms (Cabeza et al., 2018; Nyberg et

1325 al., 2012; Park and Reuter-Lorenz, 2009; Reuter-Lorenz and Park, 2014). This then seems to  
1326 be complemented by compensatory MFG recruitment in theta.

1327

1328 Our interpretation of the current theta power findings as compensation rather than neural  
1329 noise was further corroborated by more extensive theta connectivity in the 60+ years group in  
1330 comparison to the 19-30 years group, across almost all conditions, reflected in NBS results,  
1331 particularly in frontal and temporal regions and the cerebellum (Figures 9 and 10). The 40-49  
1332 years group also showed more extensive connectivity than the younger group in the two  
1333 Switch conditions, again predominantly between frontal, temporal and parietal regions, as  
1334 well as the cerebellum. The additional recruitment of frontal regions could reflect compensa-  
1335 tory recruitment of top-down mechanisms to bias attention (Hopfinger et al., 2000). The addi-  
1336 tional temporal lobe activity in the 60+ years group on the other hand could indicate further  
1337 compensatory strategies to complete the task, such as episodic memory encoding (Schacter  
1338 and Wagner, 1999) or silent vocalisation (Graves et al., 2007; Hickok and Poeppel, 2007;  
1339 Hocking and Price, 2009; Smith et al., 1998). Increased frontal theta with increased age con-  
1340 trasts with Cummins and Finnigan's (2007) findings of reduced theta in frontal EEG elec-  
1341 trodes, and instead supports compensatory models of ageing such as STAC (Park and Reuter-  
1342 Lorenz, 2009; Reuter-Lorenz and Park, 2014) and PASA (Davis et al., 2008). Increased theta  
1343 functional connectivity with increased age also opposes the notion that more widely distrib-  
1344 uted activity in the current study was a result of increased neural noise (Shih, 2009; Welford,  
1345 1981). Based on the assumption that task-related, frequency-specific connectivity requires  
1346 higher neural precision, if activity seen in additional regions was merely due to increased  
1347 neural noise one would expect weaker connectivity in the 60+ years group in comparison to  
1348 the 19-30 years group rather than increased phase synchronisation. The latter, however, does  
1349 not appear to be the case (Figures 9 and 10). Additional evidence for compensatory recruit-  
1350 ment of temporal cortex in the 60+ years group comes from a correlation between Switch-  
1351 Costs and increased network centrality of the left middle temporal pole (Cabeza et al., 2018),  
1352 as reported in the SM, suggesting that those participants with stronger connectivity to the  
1353 temporal pole have lower Switch-Costs. This further complements our observation that as  
1354 theta power in the frontal and parietal lobe increased, Switch-Costs decreased in the 60+  
1355 years group.

1356

1357 The "middle-aged" group (40-49 years) provided an interesting case that presented character-  
1358 istics set between the youngest and the oldest groups, with some patterns being closer to the

1359 younger and some patterns being closer to the older group. This was discussed in the context  
1360 of RTs, where the 40-49 years group did not differ significantly overall from the youngest  
1361 group, yet showed increased Target Switch-Costs. For instance, theta connectivity was  
1362 weaker in the 40-49 years group in comparison to the 19-30 years group for networks that  
1363 were stronger when No-Switch was required (Figures 9B and 10B). However, connectivity  
1364 was increased in the 40-49 years group in comparison to the 19-30 years group in a frontal,  
1365 temporal, parietal and cerebellar network, when a Switch was required (Figures 9A and 10A).  
1366 Weaker connectivity in the easiest condition could reflect the start of a decline in attentional  
1367 networks that is not yet seen in behaviour, and therefore not yet compensated for with re-  
1368 cruitment of additional top-down mechanisms that are only recruited when attentional de-  
1369 mands increase. Furthermore, several nodes were more central in the No-Target Switch net-  
1370 work in the 40-49 years group in comparison to the 19-30 years group (see Figure SM9). Im-  
1371 portantly, as the network centrality of these nodes increased across individuals, Switch-Costs  
1372 in the 40-49 years group decreased (see correlations reported in the SM), further supporting  
1373 the compensatory role of this additional recruitment.

1374

1375 Both 40-49 and 60+ years groups displayed increased connectivity to the cerebellum, re-  
1376 flected in both theta NBS results (Figures 9 and 10) and node centrality measures reported in  
1377 the SM in Figure SM9. The role of the cerebellum in cognitive processing is still poorly un-  
1378 derstood, but recent reviews suggest that the cerebellum monitors and regulates cortical proc-  
1379 essing (Rao et al., 2001), especially when timing is required (Keren-Happuch et al., 2014;  
1380 O'Reilly et al., 2008). This could be crucial in the current context for sustaining temporal at-  
1381 tention and for a timely switch to spatial attention. Increased connectivity between the cortex  
1382 and the cerebellum in older groups could therefore be due to a greater need to regulate and  
1383 time cortical activity as excitatory mechanisms across the cortex are less efficient (Shih,  
1384 2009). However, cerebellar activity should be interpreted with caution due to it being close to  
1385 the edge of the MEG sensor array; hence, such activity could be due to spatial leakage from  
1386 occipital generators.

1387

## 1388 **4.2. Alpha**

1389 In addition to age group differences in theta networks, prior to switching to attend to the VS,  
1390 modulations of alpha power were both stronger and more widely distributed across the cortex  
1391 in the 40-49 and 60+ years groups in comparison to the 19-30 years group (Figures 6 and 7).  
1392 Although alpha MST mean eccentricity seemed consistent with these power changes, by pre-

1393 sending “chain-like”, long range connectivity in the 60+ years group, rather than “star-like”,  
1394 local connectivity, NBS revealed no significant differences between the 19-30 and 60+ years  
1395 groups in alpha connectivity for the Target Switch network (Figure 11). Furthermore, the 19-  
1396 30 years group recruited a more widely distributed No-Target Switch network than the 60+  
1397 years group (Figure 12) at alpha frequency. These two results seem inconsistent with source  
1398 power and could suggest that the widely distributed alpha power effects in the 60+ years  
1399 group reflect increased neural noise and dedifferentiation rather than compensation (Cabeza,  
1400 2002; Huettel et al., 2001; Shih, 2009; Welford, 1981). This conclusion would support Vaden  
1401 et al.’s (2012) proposal that alpha modulation becomes redundant with increased age, and is  
1402 further supported by the absence of a correlation between alpha power (difference) and  
1403 Switch-Costs in the 60+ years group. However, the TFRs in Figure 3 clearly indicate that the  
1404 older groups exhibited greater alpha power decreases in comparison to the younger group.  
1405 Furthermore, the older group displayed stronger alpha network connectivity than the 19-30  
1406 years group in the No-Switch networks (No Switch > No-Target Switch; Figure 12D). Rather  
1407 than increased neural noise it could therefore be that group differences in mere signal ampli-  
1408 tude (much lower in the 60+ years group than in the 19-30 years group) or signal-to-noise  
1409 ratio (SNR) resulted in a less sensitive estimation of connectivity in the 60+ years group in  
1410 comparison to the 19-30 years group.

1411

1412 Previous literature has shown that pre-stimulus alpha desynchronization no longer predicts  
1413 successful stimulus processing in older age (Deiber et al., 2013) as it does in younger adults  
1414 (Sauseng et al., 2005). The current findings call into question whether pre-stimulus alpha de-  
1415 synchronisation predicts successful target stimulus processing in middle-age. Questions also  
1416 arise as to how alpha is functionally relevant in older age, and what alternative mechanisms  
1417 are implemented to gate sensory processing (Jensen and Mazaheri, 2010) and enhance atten-  
1418 tion to visual stimuli (Capotosto et al., 2009; Hanslmayr et al., 2007; Hanslmayr et al., 2005;  
1419 Klimesch et al., 2007; Rohenkohl and Nobre, 2011; Sauseng et al., 2005; Thut et al., 2006;  
1420 Yamagishi et al., 2003) if these are no longer relying on alpha oscillations.

1421

1422 Alpha network connectivity in the 40-49 years group provides further evidence that this age  
1423 group reflects an intermediate stage of ageing, where in some aspects they are similar to  
1424 younger adults and in some aspects they are closer to older adults. For example, similarly to  
1425 patterns observed in theta network connectivity, the 40-49 years group showed a more widely  
1426 distributed alpha network than the 19-30 years group in the Target Switch network (Figure

1427 11A), but a weaker alpha network than the 19-30 years group in the No-Switch network (Fig-  
1428 ure 11B). In contrast, comparisons of the No-Target Switch and No-Switch conditions re-  
1429 vealed no significant network differences between 40-49 and 19-30 years groups, consistent  
1430 with no significant behavioural differences in No-Target RT-Switch-Costs. From these find-  
1431 ings it therefore seems that there is no effect of age on RTs or alpha power modulation at the  
1432 age of 40-49 years during monitoring of the RSVP stream when there is no target present, but  
1433 there is more extensive alpha connectivity compared to the younger group when target proc-  
1434 essing and switching after target processing is required, which mirrors the pattern of in-  
1435 creased RTs.

1436

1437 The pattern of similarity between the 40-49 and 19-30 years groups in the No-Switch condi-  
1438 tion, but significant differences between these groups in the Target Switch condition was  
1439 again mirrored in the global MST metric of mean eccentricity (Figure 13). In contrast to the  
1440 60+ years group the 40-49 and 19-30 years groups did not significantly differ in mean eccen-  
1441 tricity in the No-Switch condition. However, in the Target Switch condition, both of the older  
1442 groups showed significantly higher mean eccentricity in comparison to the youngest group,  
1443 indicating on average longer path lengths between nodes, which could be tied to recruitment  
1444 of larger, less focal networks. Thus, alpha measures of node centrality corroborate the re-  
1445 cruitment of compensatory networks despite age group comparisons of alpha connectivity  
1446 reflected in NBS (60+ vs 19-30 years; Figure 12) potentially suggesting increased neural  
1447 noise.

1448

## 1449 **5. Conclusions**

1450 We have replicated the findings of Callaghan et al. (2017), observing age-related declines in  
1451 the ability to switch between temporal and spatial attention. Difficulties in refocusing atten-  
1452 tion between time and space seem to be accompanied by a deficit in theta power modulation  
1453 in occipital and cerebellar regions. Older and middle-aged adults seem to partially compen-  
1454 sate for this posterior theta deficit by recruiting a more extensive frontal network, possibly  
1455 reflecting increased reliance on top-down attentional control. In addition to more extensive  
1456 frontal recruitment, the 60+ years group showed recruitment (in both power and connectivity)  
1457 of the temporal lobes, possibly reflecting further compensation strategies such as episodic  
1458 memory encoding or silent vocalisation. Efficient (low) Switch-Costs in the youngest group  
1459 were reflected by parietal theta effects that were absent in both older groups. However, resid-  
1460 ual parietal theta in the oldest group was related to reduced Switch-Costs, thus, resemblance

1461 with efficient processing in the young brain appears to be beneficial for older brains. Con-  
1462 trary to the notion of functional connectivity becoming weaker with age due to increased neu-  
1463 ral noise, increased connectivity was predominantly observed in older age groups, particu-  
1464 larly at theta frequency and with increased attentional demands in the Switch conditions. This  
1465 increase in connectivity further corroborates that more widely distributed activity reflects  
1466 compensatory mechanisms. Stronger and more extensive alpha band power modulation was  
1467 found across the cortex with increased age. In contrast to theta oscillations, alpha power  
1468 modulations were not correlated with Switch-Costs and functional connectivity was not  
1469 stronger with increased age, indicating that increases in the extent of power modulation could  
1470 merely be neural noise. Further research is required to explore this further as group differ-  
1471 ences in SNR could have affected alpha connectivity estimates.

1472

1473 Overall our results demonstrate that older adults partially compensate for declines in atten-  
1474 tional flexibility with the recruitment of additional neural mechanisms. These findings have  
1475 important implications for future work, as they raise the question as to whether this compen-  
1476 satory recruitment can be enhanced with cognitive training programmes. Although we have  
1477 shown that older adults compensate for functional decline, this compensation is only partially  
1478 successful, and both middle and older age groups displayed poorer switching performance  
1479 compared to younger adults. Improving older adults attentional flexibility could improve their  
1480 performance in everyday functions such as driving, where one is required to quickly switch  
1481 between fast changing events in multiple surrounding locations.

1482

## 1483 **6. Acknowledgements**

1484 This research was supported by funding from The Rees Jeffreys Road Fund and by the  
1485 School of Life and Health Sciences at Aston University. Scanning costs were supported by  
1486 The Wellcome Trust Lab for MEG Studies and the Dr Hadwen Trust for Humane Research.  
1487 In addition we would like to thank colleagues at the Aston Brain Centre for assisting with  
1488 MRI data acquisition.

1489

## 1490 **7. References**

1491 Adamo, M., Westerfield, M., Haist, F., Townsend, J., 2003. Cross - modal shifting attention  
1492 in healthy aging: an fMRI study. Society for Neuroscience Abstract Viewer and Itinerary  
1493 Planner 2003, Abstract No. 933.938.

- 1494 Asada, H., Fukuda, Y., Tsunoda, S., Yamaguchi, M., Tonoike, M., 1999. Frontal midline  
1495 theta rhythms reflect alternative activation of prefrontal cortex and anterior cingulate  
1496 cortex in humans. *Neuroscience Letters* 274, 29-32.
- 1497 Aydin, S., Strang, N.C., Manahilov, V., 2013. Age-related deficits in attentional control of  
1498 perceptual rivalry. *Vision Research* 77, 32-40.
- 1499 Badre, D., Wagner, A.D., 2004. Selection, Integration, and Conflict Monitoring: Assessing  
1500 the Nature and Generality of Prefrontal Cognitive Control Mechanisms. *Neuron* 41, 473-  
1501 487.
- 1502 Ball, K.K., Roenker, D.L., Wadley, V.G., Edwards, J.D., Roth, D.L., McGwin, G., Raleigh,  
1503 R., Joyce, J.J., Cissell, G.M., Dube, T., 2006. Can High-Risk Older Drivers Be Identified  
1504 Through Performance-Based Measures in a Department of Motor Vehicles Setting?  
1505 *Journal of the American Geriatrics Society* 54, 77-84.
- 1506 Baluch, F., Itti, L., 2011. Mechanisms of top-down attention. *Trends in Neurosciences* 34,  
1507 210-224.
- 1508 Beck, D.M., Kastner, S., 2009. Top-down and bottom-up mechanisms in biasing competition  
1509 in the human brain. *Vision Research* 49, 1154-1165.
- 1510 Bennett, I.J., Motes, M.A., Rao, N.K., Rypma, B., 2012. White matter tract integrity predicts  
1511 visual search performance in young and older adults. *Neurobiology of Aging* 33.
- 1512 Bögels, S., Barr, D.J., Garrod, S., Kessler, K., 2014. Conversational Interaction in the  
1513 Scanner: Mentalizing during Language Processing as Revealed by MEG. *Cerebral Cortex*.
- 1514 Bonnefond, M., Jensen, O., 2015. Gamma Activity Coupled to Alpha Phase as a Mechanism  
1515 for Top-Down Controlled Gating. *Plos One* 10.
- 1516 Bouvier, S.E., 2009. Top-Down Influences of Spatial Attention in Visual Cortex. *The Journal*  
1517 *of Neuroscience* 29, 1597-1598.
- 1518 Buckner, R.L., Snyder, A.Z., Sanders, A.L., Raichle, M.E., Morris, J.C., 2000. Functional  
1519 brain imaging of young, nondemented, and demented older adults. *Journal of Cognitive*  
1520 *Neuroscience* 12, 24-34.
- 1521 Budescu, D.V., 1982. The power of the F test in normal populations with heterogeneous  
1522 variances. *Educational and Psychological Measurement* 42, 409-416.
- 1523 Budescu, D.V., Appelbaum, M.I., 1981. Variance stabilizing transformations and the power  
1524 of the F test. *Journal of Educational and Behavioral Statistics* 6, 55-74.
- 1525 Bundesen, C., Habekost, T., Kyllingsbæk, S., 2005. A neural theory of visual attention:  
1526 bridging cognition and neurophysiology. *Psychological Review* 112, 291.
- 1527 Busch, N.A., Dubois, J., VanRullen, R., 2009. The Phase of Ongoing EEG Oscillations  
1528 Predicts Visual Perception. *The Journal of Neuroscience* 29, 7869-7876.
- 1529 Busch, N.A., VanRullen, R., 2010. Spontaneous EEG oscillations reveal periodic sampling of  
1530 visual attention. *Proceedings of the National Academy of Sciences of the United States of*  
1531 *America* 107, 16048-16053.
- 1532 Cabeza, R., 2002. Hemispheric asymmetry reduction in older adults: The HAROLD model.  
1533 *Psychology and Aging* 17, 85-100.
- 1534 Cabeza, R., Albert, M.S., Belleville, S., Craik, F.I.M., Duarte, A., Grady, C.L., Lindenberger,  
1535 U., Nyberg, L., Park, D.C., Reuter-Lorenz, P.A., Rugg, M.D., Steffener, J., Rajah, M.N.,  
1536 2018. Maintenance, reserve and compensation: the cognitive neuroscience of healthy  
1537 ageing. *Nature Reviews Neuroscience* 19, 701-710.
- 1538 Cabeza, R., Daselaar, S.M., Dolcos, F., Prince, S.E., Budde, M., Nyberg, L., 2004. Task-  
1539 independent and Task-specific Age Effects on Brain Activity during Working Memory,  
1540 Visual Attention and Episodic Retrieval. *Cerebral Cortex* 14, 364-375.
- 1541 Callaghan, E., Holland, C., Kessler, K., 2017. Age-related changes in the ability to switch  
1542 between temporal and spatial attention. *Frontiers in Aging Neuroscience* 9.



- 1543 Capotosto, P., Babiloni, C., Romani, G.L., Corbetta, M., 2009. Frontoparietal Cortex  
1544 Controls Spatial Attention through Modulation of Anticipatory Alpha Rhythms. *The*  
1545 *Journal of Neuroscience* 29, 5863-5872.
- 1546 Cavanagh, J.F., Cohen, M.X., Allen, J.J.B., 2009. Prelude to and resolution of an error: EEG  
1547 phase synchrony reveals cognitive control dynamics during action monitoring. *The*  
1548 *Journal of neuroscience : the official journal of the Society for Neuroscience* 29, 98-105.
- 1549 Cavanagh, J.F., Frank, M.J., 2014. Frontal theta as a mechanism for cognitive control. *Trends*  
1550 *in Cognitive Sciences* 18, 414-421.
- 1551 Colcombe, S.J., Kramer, A.F., Erickson, K.I., Scalf, P., 2005. The implications of cortical  
1552 recruitment and brain morphology for individual differences in inhibitory function in  
1553 aging humans. *Psychology and Aging* 20, 363.
- 1554 Coull, J.T., Nobre, A.C., 1998. Where and when to pay attention: The neural systems for  
1555 directing attention to spatial locations and to time intervals as revealed by both PET and  
1556 fMRI. *Journal of Neuroscience* 18, 7426-7435.
- 1557 Cummins, T.D.R., Finnigan, S., 2007. Theta power is reduced in healthy cognitive aging.  
1558 *International Journal of Psychophysiology* 66, 10-17.
- 1559 Daigneault, S., Braun, C.M.J., Whitaker, H.A., 1992. Early effects of normal aging on  
1560 perseverative and non-perseverative prefrontal measures. *Developmental*  
1561 *Neuropsychology* 8, 99-114.
- 1562 Davis, S.W., Dennis, N.A., Daselaar, S.M., Fleck, M.S., Cabeza, R., 2008. Qué PASA? The  
1563 Posterior–Anterior Shift in Aging. *Cerebral Cortex* 18, 1201-1209.
- 1564 Dehaene, S., Changeux, J.-P., Naccache, L., Sackur, J., Sergent, C., 2006. Conscious,  
1565 preconscious, and subliminal processing: a testable taxonomy. *Trends in Cognitive*  
1566 *Sciences* 10, 204-211.
- 1567 Dehaene, S., Naccache, L., Le Clec'H, G., Koechlin, E., Mueller, M., Dehaene-Lambertz, G.,  
1568 van de Moortele, P.-F., Le Bihan, D., 1998. Imaging unconscious semantic priming.  
1569 *Nature* 395, 597.
- 1570 Deiber, M.-P., Ibanez, V., Missonnier, P., Rodriguez, C., Giannakopoulos, P., 2013. Age-  
1571 associated modulations of cerebral oscillatory patterns related to attention control.  
1572 *Neuroimage* 82, 531-546.
- 1573 Demiralp, T., Başar, E., 1992. Theta rhythmicities following expected visual and auditory  
1574 targets. *International Journal of Psychophysiology* 13, 147-160.
- 1575 Desimone, R., 1998. Visual attention mediated by biased competition in extrastriate visual  
1576 cortex. *Philosophical Transactions of the Royal Society of London. Series B: Biological*  
1577 *Sciences* 353, 1245-1255.
- 1578 Dockree, P.M., Kelly, S.P., Foxe, J.J., Reilly, R.B., Robertson, I.H., 2007. Optimal sustained  
1579 attention is linked to the spectral content of background EEG activity: greater ongoing  
1580 tonic alpha (~10 Hz) power supports successful phasic goal activation. *European Journal*  
1581 *of Neuroscience* 25, 900-907.
- 1582 Dugué, L., Marque, P., VanRullen, R., 2011. The Phase of Ongoing Oscillations Mediates the  
1583 Causal Relation between Brain Excitation and Visual Perception. *The Journal of*  
1584 *Neuroscience* 31, 11889-11893.
- 1585 Fabiani, M., Low, K.A., Wee, E., Sable, J.J., Gratton, G., 2006. Reduced Suppression or  
1586 Labile Memory? Mechanisms of Inefficient Filtering of Irrelevant Information in Older  
1587 Adults. *Journal of Cognitive Neuroscience* 18, 637-650.
- 1588 Foster, J.K., Behrmann, M., Stuss, D.T., 1995. Aging and visual search: Generalized  
1589 cognitive slowing or selective deficit in attention? *Aging and Cognition* 2, 279-299.
- 1590 Fu, S.M., Greenwood, P.M., Parasuraman, R., 2005. Brain mechanisms of involuntary  
1591 visuospatial attention: An event-related potential study. *Human Brain Mapping* 25, 378-  
1592 390.

- 1593 Gazzaley, A., Clapp, W., Kelley, J., McEvoy, K., Knight, R.T., D'Esposito, M., 2008. Age-  
1594 related top-down suppression deficit in the early stages of cortical visual memory  
1595 processing. *Proceedings of the National Academy of Sciences* 105, 13122-13126.
- 1596 Gooding-Williams, G.F., Wang, H., Kessler, K., 2016. THETA-Rhythm makes the world go  
1597 round: Dissociative effects of TMS theta vs alpha entrainment of right pTPJ on embodied  
1598 perspective transformations. *bioRxiv*.
- 1599 Grady, C.L., 2000. Functional brain imaging and age-related changes in cognition. *Biological*  
1600 *Psychology* 54, 259-281.
- 1601 Graves, W.W., Grabowski, T.J., Mehta, S., Gordon, J.K., 2007. A Neural Signature of  
1602 Phonological Access: Distinguishing the Effects of Word Frequency from Familiarity and  
1603 Length in Overt Picture Naming. *Journal of Cognitive Neuroscience* 19, 617-631.
- 1604 Green, J.J., McDonald, J.J., 2008. Electrical neuroimaging reveals timing of attentional  
1605 control activity in human brain. *Plos Biology* 6, 730-738.
- 1606 Greenwood, P.M., Parasuraman, R., 1994. Attentional disengagement deficit in nondemented  
1607 elderly over 75 years of age. *Aging, Neuropsychology, and Cognition* 1, 188-202.
- 1608 Gross, J., Kujala, J., Hämäläinen, M., Timmermann, L., Schnitzler, A., Salmelin, R., 2001.  
1609 Dynamic imaging of coherent sources: studying neural interactions in the human brain.  
1610 *Proceedings of the National Academy of Sciences* 98, 694-699.
- 1611 Gross, J., Schmitz, F., Schnitzler, I., Kessler, K., Shapiro, K., Hommel, B., Schnitzler, A.,  
1612 2004. Modulation of long-range neural synchrony reflects temporal limitations of visual  
1613 attention in humans. *Proceedings of the National Academy of Sciences of the United*  
1614 *States of America* 101, 13050-13055.
- 1615 Hale, S., Myerson, J., Smith, G.A., Poon, L.W., 1988. Age, variability, and speed: between-  
1616 subjects diversity. *Psychology and Aging* 3, 407.
- 1617 Hanslmayr, S., Aslan, A., Staudigl, T., Klimesch, W., Herrmann, C.S., Bäuml, K.-H., 2007.  
1618 Prestimulus oscillations predict visual perception performance between and within  
1619 subjects. *Neuroimage* 37, 1465-1473.
- 1620 Hanslmayr, S., Klimesch, W., Sauseng, P., Gruber, W., Doppelmayr, M., Freunberger, R.,  
1621 Pecherstorfer, T., 2005. Visual discrimination performance is related to decreased alpha  
1622 amplitude but increased phase locking. *Neuroscience Letters* 375, 64-68.
- 1623 Hasher, L., Zacks, R.T., 1988. Working Memory, Comprehension, and Aging: A Review and  
1624 a New View. In: Gordon, H.B. (Ed.), *Psychology of Learning and Motivation*. Academic  
1625 Press, pp. 193-225.
- 1626 Herring, J.D., Thut, G., Jensen, O., Bergmann, T.O., 2015. Attention Modulates TMS-Locked  
1627 Alpha Oscillations in the Visual Cortex. *The Journal of Neuroscience* 35, 14435-14447.
- 1628 Hickok, G., Poeppel, D., 2007. The cortical organization of speech processing. *Nature*  
1629 *Reviews Neuroscience* 8, 393.
- 1630 Hocking, J., Price, C.J., 2009. Dissociating verbal and nonverbal audiovisual object  
1631 processing. *Brain and Language* 108, 89-96.
- 1632 Hong, X.F., Sun, J.F., Bengson, J.J., Mangun, G.R., Tong, S.B., 2015. Normal aging  
1633 selectively diminishes alpha lateralization in visual spatial attention. *Neuroimage* 106,  
1634 353-363.
- 1635 Hopfinger, J.B., Buonocore, M.H., Mangun, G.R., 2000. The neural mechanisms of top-down  
1636 attentional control. *Nature Neuroscience* 3, 284.
- 1637 Huettel, S.A., Singerman, J.D., McCarthy, G., 2001. The effects of aging upon the  
1638 hemodynamic response measured by functional MRI. *Neuroimage* 13, 161-175.
- 1639 Humphrey, D.G., Kramer, A.F., 1997. Age differences in visual search for feature,  
1640 conjunction, and triple-conjunction targets. *Psychology and Aging* 12, 704-717.
- 1641 Imaruoka, T., Yanagida, T., Miyauchi, S., 2003. Attentional set for external information  
1642 activates the right intraparietal area. *Cognitive Brain Research* 16, 199-209.

- 1643 Jensen, O., Mazaheri, A., 2010. Shaping functional architecture by oscillatory alpha activity:  
1644 gating by inhibition. *Frontiers in Human Neuroscience* 4, 186.
- 1645 Kastner, S., Ungerleider, L.G., 2000. Mechanisms of Visual Attention in the Human Cortex.  
1646 *Annual Review of Neuroscience* 23, 315-341.
- 1647 Keren-Happuch, E., Chen, S.-H.A., Ho, M.-H.R., Desmond, J.E., 2014. A Meta-analysis of  
1648 Cerebellar Contributions to Higher Cognition from PET and fMRI studies. *Human Brain*  
1649 *Mapping* 35, 593-615.
- 1650 Kerns, J.G., Cohen, J.D., MacDonald, A.W., Cho, R.Y., Stenger, V.A., Carter, C.S., 2004.  
1651 Anterior Cingulate Conflict Monitoring and Adjustments in Control. *Science* 303, 1023-  
1652 1026.
- 1653 Klimesch, W., Sauseng, P., Hanslmayr, S., 2007. EEG alpha oscillations: The inhibition-  
1654 timing hypothesis. *Brain Research Reviews* 53, 63-88.
- 1655 Konishi, S., Nakajima, K., Uchida, I., Kikyo, H., Kameyama, M., Miyashita, Y., 1999.  
1656 Common inhibitory mechanism in human inferior prefrontal cortex revealed by event-  
1657 related functional MRI. *Brain* 122, 981-991.
- 1658 Kruskal, J.B., 1956. On the shortest spanning subtree of a graph and the traveling salesman  
1659 problem. *Proceedings of the American Mathematical society* 7, 48-50.
- 1660 Lague-Beauvais, M., Brunet, J., Gagnon, L., Lesage, F., Bherer, L., 2013. A fNIRS  
1661 investigation of switching and inhibition during the modified Stroop task in younger and  
1662 older adults. *Neuroimage* 64, 485-495.
- 1663 Lahar, C.J., Isaak, M.I., McArthur, A.D., 2001. Age Differences in the Magnitude of the  
1664 Attentional Blink. *Aging, Neuropsychology, and Cognition* 8, 149-159.
- 1665 Lee, T.-Y., Hsieh, S., 2009. The Limits of Attention for Visual Perception and Action in  
1666 Aging. *Aging Neuropsychology and Cognition* 16, 311-329.
- 1667 Li, L., Gratton, C., Fabiani, M., Knight, R.T., 2013. Age-related frontoparietal changes  
1668 during the control of bottom-up and top-down attention: an ERP study. *Neurobiology of*  
1669 *Aging* 34, 477-488.
- 1670 Luck, S.J., Girelli, M., McDermott, M.T., Ford, M.A., 1997. Bridging the gap between  
1671 monkey neurophysiology and human perception: An ambiguity resolution theory of visual  
1672 selective attention. *Cognitive Psychology* 33, 64-87.
- 1673 Lustig, C., Hasher, L., Zacks, R.T., 2007. Inhibitory deficit theory: Recent developments in a  
1674 “new view”. *Inhibition in cognition* 17, 145-162.
- 1675 Maciokas, J.B., Crognale, M.A., 2003. Cognitive and attentional changes with age: Evidence  
1676 from attentional blink deficits. *Experimental Aging Research* 29, 137-153.
- 1677 Madden, D.J., 2007. Aging and visual attention. *Current Directions in Psychological Science*  
1678 16, 70-74.
- 1679 Madden, D.J., Spaniol, J., Whiting, W.L., Bucur, B., Provenzale, J.M., Cabeza, R., White,  
1680 L.E., Huettel, S.A., 2007. Adult age differences in the functional neuroanatomy of visual  
1681 attention: A combined fMRI and DTI study. *Neurobiology of Aging* 28, 459-476.
- 1682 Madden, D.J., Turkington, T.G., Provenzale, J.M., Denny, L.L., Langley, L.K., Hawk, T.C.,  
1683 Coleman, R.E., 2002. Aging and attentional guidance during visual search: Functional  
1684 neuroanatomy by positron emission tomography. *Psychology and Aging* 17, 24-43.
- 1685 Maris, E., Oostenveld, R., 2007. Nonparametric statistical testing of EEG-and MEG-data.  
1686 *Journal of Neuroscience Methods* 164, 177-190.
- 1687 Mathewson, K.E., Gratton, G., Fabiani, M., Beck, D.M., Ro, T., 2009. To See or Not to See:  
1688 Prestimulus  $\alpha$  Phase Predicts Visual Awareness. *The Journal of Neuroscience* 29, 2725-  
1689 2732.
- 1690 McLaughlin, P.M., Murtha, S.J.E., 2010. The Effects of Age and Exogenous Support on  
1691 Visual Search Performance. *Experimental Aging Research* 36, 325-345.

- 1692 Min, B.-K., Park, H.-J., 2010. Task-related modulation of anterior theta and posterior alpha  
1693 EEG reflects top-down preparation. *BMC Neuroscience* 11, 1-8.
- 1694 Morse, C.K., 1993. Does variability increase with age? An archival study of cognitive  
1695 measures. *Psychology and Aging* 8, 156.
- 1696 Neider, M.B., Kramer, A.F., 2011. OLDER ADULTS CAPITALIZE ON CONTEXTUAL  
1697 INFORMATION TO GUIDE SEARCH. *Experimental Aging Research* 37, 539-571.
- 1698 Nelson, B.G., Bassett, D.S., Camchong, J., Bullmore, E.T., Lim, K.O., 2017. Comparison of  
1699 large-scale human brain functional and anatomical networks in schizophrenia.  
1700 *NeuroImage : Clinical* 15, 439-448.
- 1701 Noone, P., 2015. Addenbrooke's Cognitive Examination-III. *Occupational Medicine* 65, 418-  
1702 420.
- 1703 Nyberg, L., Lovden, M., Riklund, K., Lindenberger, U., Backman, L., 2012. Memory aging  
1704 and brain maintenance. *Trends Cogn Sci* 16, 292-305.
- 1705 O'Reilly, J.X., Mesulam, M.M., Nobre, A.C., 2008. The cerebellum predicts the timing of  
1706 perceptual events. *Journal of Neuroscience* 28, 2252-2260.
- 1707 Oostenveld, R., Fries, P., Maris, E., Schoffelen, J.-M., 2011. FieldTrip: open source software  
1708 for advanced analysis of MEG, EEG, and invasive electrophysiological data.  
1709 *Computational Intelligence and Neuroscience* 2011, 9.
- 1710 Pagano, S., Fait, E., Monti, A., Brignani, D., Mazza, V., 2015. Electrophysiological  
1711 Correlates of Subitizing in Healthy Aging. *Plos One* 10.
- 1712 Park, D.C., Reuter-Lorenz, P., 2009. The Adaptive Brain: Aging and Neurocognitive  
1713 Scaffolding. *Annual Review of Psychology* 60, 173-196.
- 1714 Plude, D.J., Doussardroosevelt, J.A., 1989. AGING, SELECTIVE ATTENTION, AND  
1715 FEATURE INTEGRATION. *Psychology and Aging* 4, 98-105.
- 1716 Polich, J., Howard, L., Starr, A., 1985. Effects of Age on the P300 Component of the Event-  
1717 related Potential From Auditory Stimuli: Peak Definition, Variation, and Measurement.  
1718 *Journal of Gerontology* 40, 721-726.
- 1719 Pollmann, S., 2004. Anterior prefrontal cortex contributions to attention control.  
1720 *Experimental Psychology* 51, 270-278.
- 1721 Pons, A.J., Cantero, J.L., Atienza, M., Garcia-Ojalvo, J., 2010. Relating structural and  
1722 functional anomalous connectivity in the aging brain via neural mass modeling.  
1723 *Neuroimage* 52, 848-861.
- 1724 Quandt, F., Bonstrup, M., Schulz, R., Timmermann, J.E., Zimmerman, M., Nolte, G., Hummel,  
1725 F.C., 2016. Spectral Variability in the Aged Brain during Fine Motor Control. *Frontiers in*  
1726 *Aging Neuroscience* 8.
- 1727 Rao, S.M., Mayer, A.R., Harrington, D.L., 2001. The evolution of brain activation during  
1728 temporal processing. *Nature Neuroscience* 4, 317.
- 1729 Raymond, J.E., Shapiro, K.L., Arnell, K.M., 1992. Temporary suppression of visual  
1730 processing in an RSVP task: An attentional blink? *Journal of Experimental Psychology:*  
1731 *Human Perception and Performance* 18, 849.
- 1732 Reichert, J.L., Kober, S.E., Witte, M., Neuper, C., Wood, G., 2016. Age-related effects on  
1733 verbal and visuospatial memory are mediated by theta and alpha II rhythms. *International*  
1734 *Journal of Psychophysiology* 99, 67-78.
- 1735 Reuter-Lorenz, P.A., Cappell, K.A., 2008. Neurocognitive Aging and the Compensation  
1736 Hypothesis. *Current Directions in Psychological Science* 17, 177-182.
- 1737 Reuter-Lorenz, P.A., Park, D.C., 2014. How does it STAC up? Revisiting the scaffolding  
1738 theory of aging and cognition. *Neuropsychology Review* 24, 355-370.
- 1739 Reynolds, J.H., Chelazzi, L., Desimone, R., 1999. Competitive mechanisms subserve  
1740 attention in macaque areas V2 and V4. *The Journal of Neuroscience* 19, 1736-1753.

- 1741 Rihs, T.A., Michel, C.M., Thut, G., 2007. Mechanisms of selective inhibition in visual spatial  
1742 attention are indexed by  $\alpha$ -band EEG synchronization. *European Journal of Neuroscience*  
1743 25, 603-610.
- 1744 Rihs, T.A., Michel, C.M., Thut, G., 2009. A bias for posterior  $\alpha$ -band power suppression  
1745 versus enhancement during shifting versus maintenance of spatial attention. *Neuroimage*  
1746 44, 190-199.
- 1747 Rohenkohl, G., Nobre, A.C., 2011. Alpha Oscillations Related to Anticipatory Attention  
1748 Follow Temporal Expectations. *Journal of Neuroscience* 31, 14076-14084.
- 1749 Ross, M.H., YurgelunTodd, D.A., Renshaw, P.F., Maas, L.C., Mendelson, J.H., Mello, N.K.,  
1750 Cohen, B.M., Levin, J.M., 1997. Age-related reduction in functional MRI response to  
1751 photic stimulation. *Neurology* 48, 173-176.
- 1752 Rubin, G.S., Ng, E.S., Bandeen-Roche, K., Keyl, P.M., Freeman, E.E., West, S.K., 2007. A  
1753 prospective, population-based study of the role of visual impairment in motor vehicle  
1754 crashes among older drivers: the SEE study. *Investigative Ophthalmology and Visual*  
1755 *Science* 48, 1483.
- 1756 Sauseng, P., Griesmayr, B., Freunberger, R., Klimesch, W., 2010. Control mechanisms in  
1757 working memory: A possible function of EEG theta oscillations. *Neuroscience &*  
1758 *Biobehavioral Reviews* 34, 1015-1022.
- 1759 Sauseng, P., Klimesch, W., Stadler, W., Schabus, M., Doppelmayr, M., Hanslmayr, S.,  
1760 Gruber, W.R., Birbaumer, N., 2005. A shift of visual spatial attention is selectively  
1761 associated with human EEG alpha activity. *European Journal of Neuroscience* 22, 2917-  
1762 2926.
- 1763 Scalf, P.E., Torralbo, A., Tapia, E., Beck, D.M., 2013. Competition explains limited attention  
1764 and perceptual resources: implications for perceptual load and dilution theories. *Frontiers*  
1765 *in Psychology* 4.
- 1766 Schack, B., Klimesch, W., Sauseng, P., 2005. Phase synchronization between theta and upper  
1767 alpha oscillations in a working memory task. *International Journal of Psychophysiology*  
1768 57, 105-114.
- 1769 Schacter, D.L., Wagner, A.D., 1999. Medial temporal lobe activations in fMRI and PET  
1770 studies of episodic encoding and retrieval. *Hippocampus* 9, 7-24.
- 1771 Shapiro, K., Hillstrom, A.P., Husain, M., 2002. Control of visuotemporal attention by inferior  
1772 parietal and superior temporal cortex. *Current Biology* 12, 1320-1325.
- 1773 Shih, S.-I., 2009. Using the Attention Cascade Model to Probe Cognitive Aging. *Psychology*  
1774 *and Aging* 24, 550-562.
- 1775 Smith, E.E., Jonides, J., Marshuetz, C., Koeppel, R.A., 1998. Components of verbal working  
1776 memory: Evidence from neuroimaging. *Proceedings of the National Academy of*  
1777 *Sciences* 95, 876-882.
- 1778 Snedecor, G.W., Cochran, W., 1967. *Statistical methods*, 593 pp. Iowa State Univ., Ames.
- 1779 Tewarie, P., Hillebrand, A., Schoonheim, M.M., van Dijk, B.W., Geurts, J.J.G., Barkhof, F.,  
1780 Polman, C.H., Stam, C.J., 2014. Functional brain network analysis using minimum  
1781 spanning trees in Multiple Sclerosis: An MEG source-space study. *Neuroimage* 88, 308-  
1782 318.
- 1783 Tewarie, P., van Dellen, E., Hillebrand, A., Stam, C.J., 2015. The minimum spanning tree:  
1784 An unbiased method for brain network analysis. *Neuroimage* 104, 177-188.
- 1785 Thut, G., Nietzel, A., Brandt, S.A., Pascual-Leone, A., 2006. alpha-Band  
1786 electroencephalographic activity over occipital cortex indexes visuospatial attention bias  
1787 and predicts visual target detection. *Journal of Neuroscience* 26, 9494-9502.
- 1788 Treisman, A., 1985. Preattentive processing in vision. *Computer Vision, Graphics, and Image*  
1789 *Processing* 31, 156-177.

- 1790 Treisman, A., Gormican, S., 1988. Feature analysis in early vision: Evidence from search  
1791 asymmetries. *Psychological Review* 95, 15-48.
- 1792 Tzourio-Mazoyer, N., Landeau, B., Papathanassiou, D., Crivello, F., Etard, O., Delcroix, N.,  
1793 Mazoyer, B., Joliot, M., 2002. Automated anatomical labeling of activations in SPM using  
1794 a macroscopic anatomical parcellation of the MNI MRI single-subject brain. *Neuroimage*  
1795 15, 273-289.
- 1796 Vaden, R.J., Hutcheson, N.L., McCollum, L.A., Kentros, J., Visscher, K.M., 2012. Older  
1797 adults, unlike younger adults, do not modulate alpha power to suppress irrelevant  
1798 information. *Neuroimage* 63, 1127-1133.
- 1799 van de Vijver, I., Cohen, M.X., Ridderinkhof, K.R., 2014. Aging affects medial but not  
1800 anterior frontal learning-related theta oscillations. *Neurobiology of Aging* 35, 692-704.
- 1801 van Leeuwen, S., Müller, N.G., Melloni, L., 2009. Age effects on attentional blink  
1802 performance in meditation. *Consciousness and Cognition* 18, 593-599.
- 1803 Van Veen, B.D., van Drongelen, W., Yuchtman, M., Suzuki, A., 1997. Localization of brain  
1804 electrical activity via linearly constrained minimum variance spatial filtering. *IEEE*  
1805 *Transactions on Biomedical Engineering* 44, 867-880.
- 1806 Vangkilde, S., Coull, J.T., Bundesen, C., 2012. Great expectations: temporal expectation  
1807 modulates perceptual processing speed. *Journal of Experimental Psychology: Human*  
1808 *Perception and Performance* 38, 1183.
- 1809 Vangkilde, S., Petersen, A., Bundesen, C., 2013. Temporal expectancy in the context of a  
1810 theory of visual attention. *Philosophical Transactions of the Royal Society B: Biological*  
1811 *Sciences* 368, 20130054.
- 1812 Verdejo-Román, J., Fornito, A., Soriano-Mas, C., Vilar-López, R., Verdejo-García, A., 2017.  
1813 Independent functional connectivity networks underpin food and monetary reward  
1814 sensitivity in excess weight. *Neuroimage* 146, 293-300.
- 1815 Verstraete, E., Veldink, J.H., Mandl, R.C.W., van den Berg, L.H., van den Heuvel, M.P.,  
1816 2011. Impaired Structural Motor Connectome in Amyotrophic Lateral Sclerosis. *Plos One*  
1817 6, e24239.
- 1818 Vinck, M., Oostenveld, R., van Wingerden, M., Battaglia, F., Pennartz, C.M.A., 2011. An  
1819 improved index of phase-synchronization for electrophysiological data in the presence of  
1820 volume-conduction, noise and sample-size bias. *Neuroimage* 55, 1548-1565.
- 1821 Voloh, B., Valiante, T.A., Everling, S., Womelsdorf, T., 2015. Theta-gamma coordination  
1822 between anterior cingulate and prefrontal cortex indexes correct attention shifts.  
1823 *Proceedings of the National Academy of Sciences of the United States of America* 112,  
1824 8457-8462.
- 1825 Wang, H., Callaghan, E., Gooding-Williams, G., McAllister, C., Kessler, K., 2016a. Rhythm  
1826 makes the world go round: An MEG-TMS study on the role of right TPJ theta oscillations  
1827 in embodied perspective taking. *Cortex* 75, 68-81.
- 1828 Wang, W.Y., Viswanathan, S., Lee, T., Grafton, S.T., 2016b. Coupling between Theta  
1829 Oscillations and Cognitive Control Network during Cross-Modal Visual and Auditory  
1830 Attention: Supramodal vs Modality-Specific Mechanisms. *Plos One* 11.
- 1831 Watson, D.G., Maylor, E.A., 2002. Aging and visual marking: Selective deficits for moving  
1832 stimuli. *Psychology and Aging* 17, 321-339.
- 1833 Welford, A.T., 1981. Signal, noise, performance, and age. *Human Factors* 23, 97-109.
- 1834 West, R., 2000. In defense of the frontal lobe hypothesis of cognitive aging. *Journal of the*  
1835 *International Neuropsychological Society* 6, 727-729.
- 1836 West, R.L., 1996. An application of prefrontal cortex function theory to cognitive aging.  
1837 *Psychological Bulletin* 120, 272-292.

- 1838 Yamagishi, N., Callan, D.E., Goda, N., Anderson, S.J., Yoshida, Y., Kawato, M., 2003.  
1839 Attentional modulation of oscillatory activity in human visual cortex. *Neuroimage* 20, 98-  
1840 113.
- 1841 Ye, A.X., Leung, R.C., Schäfer, C.B., Taylor, M.J., Doesburg, S.M., 2014. Atypical resting  
1842 synchrony in autism spectrum disorder. *Human Brain Mapping* 35, 6049-6066.
- 1843 Zalesky, A., Cocchi, L., Fornito, A., Murray, M.M., Bullmore, E., 2012. Connectivity  
1844 differences in brain networks. *Neuroimage* 60, 1055-1062.
- 1845 Zalesky, A., Fornito, A., Bullmore, E.T., 2010. Network-based statistic: Identifying  
1846 differences in brain networks. *Neuroimage* 53, 1197-1207.
- 1847 Zanto, T.P., Hennigan, K., Ostberg, M., Clapp, W.C., Gazzaley, A., 2010. Predictive  
1848 knowledge of stimulus relevance does not influence top-down suppression of irrelevant  
1849 information in older adults. *Cortex* 46, 564-574.
- 1850 Zanto, T.P., Pan, P., Liu, H., Bollinger, J., Nobre, A.C., Gazzaley, A., 2011. Age-Related  
1851 Changes in Orienting Attention in Time. *Journal of Neuroscience* 31, 12461-12470.  
1852
